# Supplementary material for: Evaluation of mapping schemes for systematic coarse graining of higher alkanes
Source: Royal Society of Chemistry journal article supplement (doi:10.1039/c7cp03926c), 2017-01-01
Supplement: c7cp03926c1.pdf [file c7cp03926c1.pdf]

bond

|       |          |
|-------|----------|
| 0.010 | 13.94900 |
| 0.020 | 13.89800 |
| 0.030 | 13.84700 |
| 0.040 | 13.79600 |
| 0.050 | 13.74500 |
| 0.060 | 13.69400 |
| 0.070 | 13.64300 |
| 0.080 | 13.59200 |
| 0.090 | 13.54100 |
| 0.100 | 13.49000 |
| 0.110 | 13.43900 |
| 0.120 | 13.38800 |
| 0.130 | 13.33700 |
| 0.140 | 13.28600 |
| 0.150 | 13.23500 |
| 0.160 | 13.18400 |
| 0.170 | 13.13300 |
| 0.180 | 13.08200 |
| 0.190 | 13.03100 |
| 0.200 | 12.98000 |
| 0.210 | 12.92900 |
| 0.220 | 12.87800 |
| 0.230 | 12.82700 |
| 0.240 | 12.77600 |
| 0.250 | 12.72500 |
| 0.260 | 12.67400 |
| 0.270 | 12.62300 |
| 0.280 | 12.57200 |
| 0.290 | 12.52100 |
| 0.300 | 12.47000 |
| 0.310 | 12.41900 |
| 0.320 | 12.36800 |
| 0.330 | 12.31700 |
| 0.340 | 12.26600 |
| 0.350 | 12.21500 |
| 0.360 | 12.16400 |
| 0.370 | 12.11300 |
| 0.380 | 12.06200 |
| 0.390 | 12.01100 |
| 0.400 | 11.96000 |
| 0.410 | 11.90900 |
| 0.420 | 11.85800 |
| 0.430 | 11.80700 |
| 0.440 | 11.75600 |
| 0.450 | 11.70500 |
| 0.460 | 11.65400 |
| 0.470 | 11.60300 |
| 0.480 | 11.55200 |
| 0.490 | 11.50100 |
| 0.500 | 11.45000 |
| 0.510 | 11.39900 |
| 0.520 | 11.34800 |
| 0.530 | 11.29700 |
| 0.540 | 11.24600 |
| 0.550 | 11.19500 |
| 0.560 | 11.14400 |
| 0.570 | 11.09300 |
| 0.580 | 11.04200 |

0.590 10.99100  
0.600 10.94000  
0.610 10.88900  
0.620 10.83800  
0.630 10.78700  
0.640 10.73600  
0.650 10.68500  
0.660 10.63400  
0.670 10.58300  
0.680 10.53200  
0.690 10.48100  
0.700 10.43000  
0.710 10.37900  
0.720 10.32800  
0.730 10.27700  
0.740 10.22600  
0.750 10.17500  
0.760 10.12400  
0.770 10.07300  
0.780 10.02200  
0.790 9.97100  
0.800 9.92000  
0.810 9.86900  
0.820 9.81800  
0.830 9.76700  
0.840 9.71600  
0.850 9.66500  
0.860 9.61400  
0.870 9.56300  
0.880 9.51200  
0.890 9.46100  
0.900 9.41000  
0.910 9.35900  
0.920 9.30800  
0.930 9.25700  
0.940 9.20600  
0.950 9.15500  
0.960 9.10400  
0.970 9.05300  
0.980 9.00200  
0.990 8.95100  
1.000 8.90000  
1.010 8.84900  
1.020 8.79800  
1.030 8.74700  
1.040 8.69600  
1.050 8.64500  
1.060 8.59400  
1.070 8.54300  
1.080 8.49200  
1.090 8.44100  
1.100 8.39000  
1.110 8.33900  
1.120 8.28800  
1.130 8.23700  
1.140 8.18600  
1.150 8.13500  
1.160 8.08400  
1.170 8.03300  
1.180 7.98200

1.190 7.93100  
1.200 7.88000  
1.210 7.82900  
1.220 7.77800  
1.230 7.72700  
1.240 7.67600  
1.250 7.62500  
1.260 7.57400  
1.270 7.52300  
1.280 7.47200  
1.290 7.42100  
1.300 7.37000  
1.310 7.31900  
1.320 7.26800  
1.330 7.21700  
1.340 7.16600  
1.350 7.11500  
1.360 7.06400  
1.370 7.01300  
1.380 6.96200  
1.390 6.91100  
1.400 6.86000  
1.410 6.80900  
1.420 6.75800  
1.430 6.70700  
1.440 6.65600  
1.450 6.60500  
1.460 6.55400  
1.470 6.50300  
1.480 6.45200  
1.490 6.40100  
1.500 5.67975  
1.510 4.61874  
1.520 3.87614  
1.530 3.39314  
1.540 2.93690  
1.550 2.46185  
1.560 1.97488  
1.570 1.53431  
1.580 1.20331  
1.590 0.84316  
1.600 0.60740  
1.610 0.36882  
1.620 0.19443  
1.630 0.08510  
1.640 0.01094  
1.650 0.00037  
1.660 0.03465  
1.670 0.10642  
1.680 0.24363  
1.690 0.41103  
1.700 0.63509  
1.710 0.90499  
1.720 1.22859  
1.730 1.58677  
1.740 1.98961  
1.750 2.45992  
1.760 2.94644  
1.770 3.58881  
1.780 4.17940

1.790 4.64676  
1.800 5.49752  
1.810 6.33100  
1.820 6.38200  
1.830 6.43300  
1.840 6.48400  
1.850 6.53500  
1.860 6.58600  
1.870 6.63700  
1.880 6.68800  
1.890 6.73900  
1.900 6.79000  
1.910 6.84100  
1.920 6.89200  
1.930 6.94300  
1.940 6.99400  
1.950 7.04500  
1.960 7.09600  
1.970 7.14700  
1.980 7.19800  
1.990 7.24900  
2.000 7.30000  
2.010 7.35100  
2.020 7.40200  
2.030 7.45300  
2.040 7.50400  
2.050 7.55500  
2.060 7.60600  
2.070 7.65700  
2.080 7.70800  
2.090 7.75900  
2.100 7.81000  
2.110 7.86100  
2.120 7.91200  
2.130 7.96300  
2.140 8.01400  
2.150 8.06500  
2.160 8.11600  
2.170 8.16700  
2.180 8.21800  
2.190 8.26900  
2.200 8.32000  
2.210 8.37100  
2.220 8.42200  
2.230 8.47300  
2.240 8.52400  
2.250 8.57500  
2.260 8.62600  
2.270 8.67700  
2.280 8.72800  
2.290 8.77900  
2.300 8.83000  
2.310 8.88100  
2.320 8.93200  
2.330 8.98300  
2.340 9.03400  
2.350 9.08500  
2.360 9.13600  
2.370 9.18700  
2.380 9.23800

2.390 9.28900  
2.400 9.34000  
2.410 9.39100  
2.420 9.44200  
2.430 9.49300  
2.440 9.54400  
2.450 9.59500  
2.460 9.64600  
2.470 9.69700  
2.480 9.74800  
2.490 9.79900  
2.500 9.85000  
2.510 9.90100  
2.520 9.95200  
2.530 10.00300  
2.540 10.05400  
2.550 10.10500  
2.560 10.15600  
2.570 10.20700  
2.580 10.25800  
2.590 10.30900  
2.600 10.36000  
2.610 10.41100  
2.620 10.46200  
2.630 10.51300  
2.640 10.56400  
2.650 10.61500  
2.660 10.66600  
2.670 10.71700  
2.680 10.76800  
2.690 10.81900  
2.700 10.87000  
2.710 10.92100  
2.720 10.97200  
2.730 11.02300  
2.740 11.07400  
2.750 11.12500  
2.760 11.17600  
2.770 11.22700  
2.780 11.27800  
2.790 11.32900  
2.800 11.38000  
2.810 11.43100  
2.820 11.48200  
2.830 11.53300  
2.840 11.58400  
2.850 11.63500  
2.860 11.68600  
2.870 11.73700  
2.880 11.78800  
2.890 11.83900  
2.900 11.89000  
2.910 11.94100  
2.920 11.99200  
2.930 12.04300  
2.940 12.09400  
2.950 12.14500  
2.960 12.19600  
2.970 12.24700  
2.980 12.29800

2.990 12.34900  
3.000 12.40000  
3.010 12.45100  
3.020 12.50200  
3.030 12.55300  
3.040 12.60400  
3.050 12.65500  
3.060 12.70600  
3.070 12.75700  
3.080 12.80800  
3.090 12.85900  
3.100 12.91000  
3.110 12.96100  
3.120 13.01200  
3.130 13.06300  
3.140 13.11400  
3.150 13.16500  
3.160 13.21600  
3.170 13.26700  
3.180 13.31800  
3.190 13.36900  
3.200 13.42000  
3.210 13.47100  
3.220 13.52200  
3.230 13.57300  
3.240 13.62400  
3.250 13.67500  
3.260 13.72600  
3.270 13.77700  
3.280 13.82800  
3.290 13.87900  
3.300 13.93000  
3.310 13.98100  
3.320 14.03200  
3.330 14.08300  
3.340 14.13400  
3.350 14.18500  
3.360 14.23600  
3.370 14.28700  
3.380 14.33800  
3.390 14.38900  
3.400 14.44000  
3.410 14.49100  
3.420 14.54200  
3.430 14.59300  
3.440 14.64400  
3.450 14.69500  
3.460 14.74600  
3.470 14.79700  
3.480 14.84800  
3.490 14.89900  
3.500 14.95000  
3.510 15.00100  
3.520 15.05200  
3.530 15.10300  
3.540 15.15400  
3.550 15.20500  
3.560 15.25600  
3.570 15.30700  
3.580 15.35800

3.590 15.40900  
3.600 15.46000  
3.610 15.51100  
3.620 15.56200  
3.630 15.61300  
3.640 15.66400  
3.650 15.71500  
3.660 15.76600  
3.670 15.81700  
3.680 15.86800  
3.690 15.91900  
3.700 15.97000  
3.710 16.02100  
3.720 16.07200  
3.730 16.12300  
3.740 16.17400  
3.750 16.22500  
3.760 16.27600  
3.770 16.32700  
3.780 16.37800  
3.790 16.42900  
3.800 16.48000  
3.810 16.53100  
3.820 16.58200  
3.830 16.63300  
3.840 16.68400  
3.850 16.73500  
3.860 16.78600  
3.870 16.83700  
3.880 16.88800  
3.890 16.93900  
3.900 16.99000  
3.910 17.04100  
3.920 17.09200  
3.930 17.14300  
3.940 17.19400  
3.950 17.24500  
3.960 17.29600  
3.970 17.34700  
3.980 17.39800  
3.990 17.44900  
4.000 17.50000  
4.010 17.55100  
4.020 17.60200  
4.030 17.65300  
4.040 17.70400  
4.050 17.75500  
4.060 17.80600  
4.070 17.85700  
4.080 17.90800  
4.090 17.95900  
4.100 18.01000  
4.110 18.06100  
4.120 18.11200  
4.130 18.16300  
4.140 18.21400  
4.150 18.26500  
4.160 18.31600  
4.170 18.36700  
4.180 18.41800

4.190 18.46900  
4.200 18.52000  
4.210 18.57100  
4.220 18.62200  
4.230 18.67300  
4.240 18.72400  
4.250 18.77500  
4.260 18.82600  
4.270 18.87700  
4.280 18.92800  
4.290 18.97900  
4.300 19.03000  
4.310 19.08100  
4.320 19.13200  
4.330 19.18300  
4.340 19.23400  
4.350 19.28500  
4.360 19.33600  
4.370 19.38700  
4.380 19.43800  
4.390 19.48900  
4.400 19.54000  
4.410 19.59100  
4.420 19.64200  
4.430 19.69300  
4.440 19.74400  
4.450 19.79500  
4.460 19.84600  
4.470 19.89700  
4.480 19.94800  
4.490 19.99900  
4.500 20.05000  
4.510 20.10100  
4.520 20.15200  
4.530 20.20300  
4.540 20.25400  
4.550 20.30500  
4.560 20.35600  
4.570 20.40700  
4.580 20.45800  
4.590 20.50900  
4.600 20.56000  
4.610 20.61100  
4.620 20.66200  
4.630 20.71300  
4.640 20.76400  
4.650 20.81500  
4.660 20.86600  
4.670 20.91700  
4.680 20.96800  
4.690 21.01900  
4.700 21.07000  
4.710 21.12100  
4.720 21.17200  
4.730 21.22300  
4.740 21.27400  
4.750 21.32500  
4.760 21.37600  
4.770 21.42700  
4.780 21.47800



|       |          |
|-------|----------|
| 4.790 | 21.52900 |
| 4.800 | 21.58000 |
| 4.810 | 21.63100 |
| 4.820 | 21.68200 |
| 4.830 | 21.73300 |
| 4.840 | 21.78400 |
| 4.850 | 21.83500 |
| 4.860 | 21.88600 |
| 4.870 | 21.93700 |
| 4.880 | 21.98800 |
| 4.890 | 22.03900 |
| 4.900 | 22.09000 |
| 4.910 | 22.14100 |
| 4.920 | 22.19200 |
| 4.930 | 22.24300 |
| 4.940 | 22.29400 |
| 4.950 | 22.34500 |
| 4.960 | 22.39600 |
| 4.970 | 22.44700 |
| 4.980 | 22.49800 |
| 4.990 | 22.54900 |
| 5.000 | 22.60000 |

angle

|        |          |
|--------|----------|
| 0.0    | 18.50000 |
| 0.500  | 18.43000 |
| 1.000  | 18.36000 |
| 1.500  | 18.29000 |
| 2.000  | 18.22000 |
| 2.500  | 18.15000 |
| 3.000  | 18.08000 |
| 3.500  | 18.01000 |
| 4.000  | 17.94000 |
| 4.500  | 17.87000 |
| 5.000  | 17.80000 |
| 5.500  | 17.73000 |
| 6.000  | 17.66000 |
| 6.500  | 17.59000 |
| 7.000  | 17.52000 |
| 7.500  | 17.45000 |
| 8.000  | 17.38000 |
| 8.500  | 17.31000 |
| 9.000  | 17.24000 |
| 9.500  | 17.17000 |
| 10.000 | 17.10000 |
| 10.500 | 17.03000 |
| 11.000 | 16.96000 |
| 11.500 | 16.89000 |
| 12.000 | 16.82000 |
| 12.500 | 16.75000 |
| 13.000 | 16.68000 |
| 13.500 | 16.61000 |
| 14.000 | 16.54000 |
| 14.500 | 16.47000 |
| 15.000 | 16.40000 |
| 15.500 | 16.33000 |
| 16.000 | 16.26000 |
| 16.500 | 16.19000 |
| 17.000 | 16.12000 |

|        |          |
|--------|----------|
| 17.500 | 16.05000 |
| 18.000 | 15.98000 |
| 18.500 | 15.91000 |
| 19.000 | 15.84000 |
| 19.500 | 15.77000 |
| 20.000 | 15.70000 |
| 20.500 | 15.63000 |
| 21.000 | 15.56000 |
| 21.500 | 15.49000 |
| 22.000 | 15.42000 |
| 22.500 | 15.35000 |
| 23.000 | 15.28000 |
| 23.500 | 15.21000 |
| 24.000 | 15.14000 |
| 24.500 | 15.07000 |
| 25.000 | 15.00000 |
| 25.500 | 14.93000 |
| 26.000 | 14.86000 |
| 26.500 | 14.79000 |
| 27.000 | 14.72000 |
| 27.500 | 14.65000 |
| 28.000 | 14.58000 |
| 28.500 | 14.51000 |
| 29.000 | 14.44000 |
| 29.500 | 14.37000 |
| 30.000 | 14.30000 |
| 30.500 | 14.23000 |
| 31.000 | 14.16000 |
| 31.500 | 14.09000 |
| 32.000 | 14.02000 |
| 32.500 | 13.95000 |
| 33.000 | 13.88000 |
| 33.500 | 13.81000 |
| 34.000 | 13.74000 |
| 34.500 | 13.67000 |
| 35.000 | 13.60000 |
| 35.500 | 13.53000 |
| 36.000 | 13.46000 |
| 36.500 | 13.39000 |
| 37.000 | 13.32000 |
| 37.500 | 13.25000 |
| 38.000 | 13.18000 |
| 38.500 | 13.11000 |
| 39.000 | 13.04000 |
| 39.500 | 12.97000 |
| 40.000 | 12.90000 |
| 40.500 | 12.83000 |
| 41.000 | 12.76000 |
| 41.500 | 12.69000 |
| 42.000 | 12.62000 |
| 42.500 | 12.55000 |
| 43.000 | 12.48000 |
| 43.500 | 12.41000 |
| 44.000 | 12.34000 |
| 44.500 | 12.27000 |
| 45.000 | 12.20000 |
| 45.500 | 12.13000 |
| 46.000 | 12.06000 |
| 46.500 | 11.99000 |
| 47.000 | 11.92000 |

|        |          |
|--------|----------|
| 47.500 | 11.85000 |
| 48.000 | 11.78000 |
| 48.500 | 11.71000 |
| 49.000 | 11.64000 |
| 49.500 | 11.57000 |
| 50.000 | 11.50000 |
| 50.500 | 11.43000 |
| 51.000 | 11.36000 |
| 51.500 | 11.29000 |
| 52.000 | 11.22000 |
| 52.500 | 11.15000 |
| 53.000 | 11.08000 |
| 53.500 | 11.01000 |
| 54.000 | 10.94000 |
| 54.500 | 10.87000 |
| 55.000 | 10.80000 |
| 55.500 | 10.73000 |
| 56.000 | 10.66000 |
| 56.500 | 10.59000 |
| 57.000 | 10.52000 |
| 57.500 | 10.45000 |
| 58.000 | 10.38000 |
| 58.500 | 10.31000 |
| 59.000 | 10.24000 |
| 59.500 | 10.17000 |
| 60.000 | 10.10000 |
| 60.500 | 10.03000 |
| 61.000 | 9.96000  |
| 61.500 | 9.89000  |
| 62.000 | 9.82000  |
| 62.500 | 9.75000  |
| 63.000 | 9.68000  |
| 63.500 | 9.61000  |
| 64.000 | 9.54000  |
| 64.500 | 9.47000  |
| 65.000 | 9.40000  |
| 65.500 | 9.33000  |
| 66.000 | 9.26000  |
| 66.500 | 9.19000  |
| 67.000 | 9.12000  |
| 67.500 | 9.05000  |
| 68.000 | 8.98000  |
| 68.500 | 8.91000  |
| 69.000 | 8.84000  |
| 69.500 | 8.77000  |
| 70.000 | 8.70000  |
| 70.500 | 8.63000  |
| 71.000 | 8.56000  |
| 71.500 | 8.49000  |
| 72.000 | 8.42000  |
| 72.500 | 8.35000  |
| 73.000 | 8.28000  |
| 73.500 | 8.21000  |
| 74.000 | 8.14000  |
| 74.500 | 8.07000  |
| 75.000 | 8.00000  |
| 75.500 | 7.93000  |
| 76.000 | 7.86000  |
| 76.500 | 7.79000  |
| 77.000 | 7.72000  |

|         |          |
|---------|----------|
| 77.500  | 7.65000  |
| 78.000  | 7.58000  |
| 78.500  | 7.51000  |
| 79.000  | 7.44000  |
| 79.500  | 7.37000  |
| 80.000  | 7.30000  |
| 80.500  | 7.23000  |
| 81.000  | 7.16000  |
| 81.500  | 7.09000  |
| 82.000  | 7.02000  |
| 82.500  | 6.95000  |
| 83.000  | 6.88000  |
| 83.500  | 6.81000  |
| 84.000  | 6.74000  |
| 84.500  | 6.67000  |
| 85.000  | 6.60000  |
| 85.500  | 6.53000  |
| 86.000  | 6.46000  |
| 86.500  | 6.39000  |
| 87.000  | 6.32000  |
| 87.500  | 6.25000  |
| 88.000  | 6.18000  |
| 88.500  | 6.11000  |
| 89.000  | 6.04000  |
| 89.500  | 5.97000  |
| 90.000  | 5.34862  |
| 90.500  | 4.44417  |
| 91.000  | 4.01587  |
| 91.500  | 3.75581  |
| 92.000  | 3.69213  |
| 92.500  | 3.10392  |
| 93.000  | 2.84108  |
| 93.500  | 2.52135  |
| 94.000  | 2.35380  |
| 94.500  | 2.08471  |
| 95.000  | 1.91419  |
| 95.500  | 1.71179  |
| 96.000  | 1.48442  |
| 96.500  | 1.31579  |
| 97.000  | 1.18459  |
| 97.500  | 1.03014  |
| 98.000  | 0.89966  |
| 98.500  | 0.78827  |
| 99.000  | 0.66977  |
| 99.500  | 0.58496  |
| 100.000 | 0.48716  |
| 100.500 | 0.42275  |
| 101.000 | 0.36032  |
| 101.500 | 0.28998  |
| 102.000 | 0.23642  |
| 102.500 | 0.18924  |
| 103.000 | 0.15727  |
| 103.500 | 0.12742  |
| 104.000 | 0.09036  |
| 104.500 | 0.05790  |
| 105.000 | 0.04872  |
| 105.500 | 0.02943  |
| 106.000 | 0.01114  |
| 106.500 | 0.00779  |
| 107.000 | -0.00155 |

|         |         |
|---------|---------|
| 107.500 | 0.00543 |
| 108.000 | 0.01180 |
| 108.500 | 0.02986 |
| 109.000 | 0.04543 |
| 109.500 | 0.08321 |
| 110.000 | 0.10834 |
| 110.500 | 0.11887 |
| 111.000 | 0.16630 |
| 111.500 | 0.21000 |
| 112.000 | 0.25630 |
| 112.500 | 0.31475 |
| 113.000 | 0.37588 |
| 113.500 | 0.45184 |
| 114.000 | 0.52197 |
| 114.500 | 0.60115 |
| 115.000 | 0.69143 |
| 115.500 | 0.80483 |
| 116.000 | 0.89502 |
| 116.500 | 1.02064 |
| 117.000 | 1.11485 |
| 117.500 | 1.31582 |
| 118.000 | 1.40381 |
| 118.500 | 1.60394 |
| 119.000 | 1.75847 |
| 119.500 | 1.94899 |
| 120.000 | 2.10378 |
| 120.500 | 2.30173 |
| 121.000 | 2.55244 |
| 121.500 | 2.75444 |
| 122.000 | 2.93800 |
| 122.500 | 3.41972 |
| 123.000 | 3.54832 |
| 123.500 | 3.92360 |
| 124.000 | 4.02277 |
| 124.500 | 4.27425 |
| 125.000 | 4.50000 |
| 125.500 | 4.57000 |
| 126.000 | 4.64000 |
| 126.500 | 4.71000 |
| 127.000 | 4.78000 |
| 127.500 | 4.85000 |
| 128.000 | 4.92000 |
| 128.500 | 4.99000 |
| 129.000 | 5.06000 |
| 129.500 | 5.13000 |
| 130.000 | 5.20000 |
| 130.500 | 5.27000 |
| 131.000 | 5.34000 |
| 131.500 | 5.41000 |
| 132.000 | 5.48000 |
| 132.500 | 5.55000 |
| 133.000 | 5.62000 |
| 133.500 | 5.69000 |
| 134.000 | 5.76000 |
| 134.500 | 5.83000 |
| 135.000 | 5.90000 |
| 135.500 | 5.97000 |
| 136.000 | 6.04000 |
| 136.500 | 6.11000 |
| 137.000 | 6.18000 |

|         |          |
|---------|----------|
| 137.500 | 6.25000  |
| 138.000 | 6.32000  |
| 138.500 | 6.39000  |
| 139.000 | 6.46000  |
| 139.500 | 6.53000  |
| 140.000 | 6.60000  |
| 140.500 | 6.67000  |
| 141.000 | 6.74000  |
| 141.500 | 6.81000  |
| 142.000 | 6.88000  |
| 142.500 | 6.95000  |
| 143.000 | 7.02000  |
| 143.500 | 7.09000  |
| 144.000 | 7.16000  |
| 144.500 | 7.23000  |
| 145.000 | 7.30000  |
| 145.500 | 7.37000  |
| 146.000 | 7.44000  |
| 146.500 | 7.51000  |
| 147.000 | 7.58000  |
| 147.500 | 7.65000  |
| 148.000 | 7.72000  |
| 148.500 | 7.79000  |
| 149.000 | 7.86000  |
| 149.500 | 7.93000  |
| 150.000 | 8.00000  |
| 150.500 | 8.07000  |
| 151.000 | 8.14000  |
| 151.500 | 8.21000  |
| 152.000 | 8.28000  |
| 152.500 | 8.35000  |
| 153.000 | 8.42000  |
| 153.500 | 8.49000  |
| 154.000 | 8.56000  |
| 154.500 | 8.63000  |
| 155.000 | 8.70000  |
| 155.500 | 8.77000  |
| 156.000 | 8.84000  |
| 156.500 | 8.91000  |
| 157.000 | 8.98000  |
| 157.500 | 9.05000  |
| 158.000 | 9.12000  |
| 158.500 | 9.19000  |
| 159.000 | 9.26000  |
| 159.500 | 9.33000  |
| 160.000 | 9.40000  |
| 160.500 | 9.47000  |
| 161.000 | 9.54000  |
| 161.500 | 9.61000  |
| 162.000 | 9.68000  |
| 162.500 | 9.75000  |
| 163.000 | 9.82000  |
| 163.500 | 9.89000  |
| 164.000 | 9.96000  |
| 164.500 | 10.03000 |
| 165.000 | 10.10000 |
| 165.500 | 10.17000 |
| 166.000 | 10.24000 |
| 166.500 | 10.31000 |
| 167.000 | 10.38000 |

|         |          |
|---------|----------|
| 167.500 | 10.45000 |
| 168.000 | 10.52000 |
| 168.500 | 10.59000 |
| 169.000 | 10.66000 |
| 169.500 | 10.73000 |
| 170.000 | 10.80000 |
| 170.500 | 10.87000 |
| 171.000 | 10.94000 |
| 171.500 | 11.01000 |
| 172.000 | 11.08000 |
| 172.500 | 11.15000 |
| 173.000 | 11.22000 |
| 173.500 | 11.29000 |
| 174.000 | 11.36000 |
| 174.500 | 11.43000 |
| 175.000 | 11.50000 |
| 175.500 | 11.57000 |
| 176.000 | 11.64000 |
| 176.500 | 11.71000 |
| 177.000 | 11.78000 |
| 177.500 | 11.85000 |
| 178.000 | 11.92000 |
| 178.500 | 11.99000 |
| 179.000 | 12.06000 |
| 179.500 | 12.13000 |
| 180.000 | 12.20000 |

dihedral

|          |          |
|----------|----------|
| -180.000 | 0.00000  |
| -179.500 | 0.00000  |
| -179.000 | 0.00000  |
| -178.500 | 0.00000  |
| -178.000 | -0.00285 |
| -177.500 | -0.00455 |
| -177.000 | -0.00319 |
| -176.500 | 0.00104  |
| -176.000 | 0.00796  |
| -175.500 | 0.01738  |
| -175.000 | 0.02911  |
| -174.500 | 0.04007  |
| -174.000 | 0.05092  |
| -173.500 | 0.06339  |
| -173.000 | 0.07725  |
| -172.500 | 0.09222  |
| -172.000 | 0.10806  |
| -171.500 | 0.12450  |
| -171.000 | 0.14129  |
| -170.500 | 0.15836  |
| -170.000 | 0.17578  |
| -169.500 | 0.19366  |
| -169.000 | 0.21206  |
| -168.500 | 0.23109  |
| -168.000 | 0.25083  |
| -167.500 | 0.27137  |
| -167.000 | 0.29276  |
| -166.500 | 0.31504  |
| -166.000 | 0.33822  |
| -165.500 | 0.36234  |
| -165.000 | 0.38741  |

-164.500 0.41346  
-164.000 0.44053  
-163.500 0.46860  
-163.000 0.49769  
-162.500 0.52778  
-162.000 0.55886  
-161.500 0.59092  
-161.000 0.62396  
-160.500 0.65795  
-160.000 0.69282  
-159.500 0.72833  
-159.000 0.76425  
-158.500 0.80035  
-158.000 0.83638  
-157.500 0.87212  
-157.000 0.90733  
-156.500 0.94199  
-156.000 0.97650  
-155.500 1.01128  
-155.000 1.04675  
-154.500 1.08334  
-154.000 1.12148  
-153.500 1.16158  
-153.000 1.20385  
-152.500 1.24795  
-152.000 1.29350  
-151.500 1.34013  
-151.000 1.38744  
-150.500 1.43506  
-150.000 1.48260  
-149.500 1.52969  
-149.000 1.57599  
-148.500 1.62118  
-148.000 1.66492  
-147.500 1.70688  
-147.000 1.74673  
-146.500 1.78415  
-146.000 1.81910  
-145.500 1.85255  
-145.000 1.88562  
-144.500 1.91943  
-144.000 1.95512  
-143.500 1.99382  
-143.000 2.03665  
-142.500 2.08425  
-142.000 2.13541  
-141.500 2.18851  
-141.000 2.24192  
-140.500 2.29401  
-140.000 2.34316  
-139.500 2.38775  
-139.000 2.42655  
-138.500 2.46020  
-138.000 2.48985  
-137.500 2.51662  
-137.000 2.54167  
-136.500 2.56613  
-136.000 2.59114  
-135.500 2.61769  
-135.000 2.64589



-134.500 2.67558  
-134.000 2.70660  
-133.500 2.73876  
-133.000 2.77192  
-132.500 2.80589  
-132.000 2.84044  
-131.500 2.87487  
-131.000 2.90827  
-130.500 2.93974  
-130.000 2.96840  
-129.500 2.99333  
-129.000 3.01364  
-128.500 3.02861  
-128.000 3.03893  
-127.500 3.04596  
-127.000 3.05107  
-126.500 3.05564  
-126.000 3.06103  
-125.500 3.06860  
-125.000 3.07956  
-124.500 3.09349  
-124.000 3.10907  
-123.500 3.12496  
-123.000 3.13980  
-122.500 3.15227  
-122.000 3.16101  
-121.500 3.16479  
-121.000 3.16354  
-120.500 3.15798  
-120.000 3.14884  
-119.500 3.13685  
-119.000 3.12276  
-118.500 3.10729  
-118.000 3.09114  
-117.500 3.07449  
-117.000 3.05711  
-116.500 3.03874  
-116.000 3.01914  
-115.500 2.99805  
-115.000 2.97522  
-114.500 2.95043  
-114.000 2.92375  
-113.500 2.89554  
-113.000 2.86619  
-112.500 2.83605  
-112.000 2.80552  
-111.500 2.77497  
-111.000 2.74477  
-110.500 2.71513  
-110.000 2.68614  
-109.500 2.65783  
-109.000 2.63028  
-108.500 2.60354  
-108.000 2.57767  
-107.500 2.55270  
-107.000 2.52840  
-106.500 2.50411  
-106.000 2.47915  
-105.500 2.45287  
-105.000 2.42458

-104.500 2.39361  
-104.000 2.35931  
-103.500 2.32156  
-103.000 2.28112  
-102.500 2.23879  
-102.000 2.19541  
-101.500 2.15179  
-101.000 2.10874  
-100.500 2.06707  
-100.000 2.02722  
-99.500 1.98889  
-99.000 1.95174  
-98.500 1.91539  
-98.000 1.87950  
-97.500 1.84372  
-97.000 1.80767  
-96.500 1.77118  
-96.000 1.73439  
-95.500 1.69749  
-95.000 1.66069  
-94.500 1.62418  
-94.000 1.58815  
-93.500 1.55279  
-93.000 1.51823  
-92.500 1.48435  
-92.000 1.45102  
-91.500 1.41810  
-91.000 1.38546  
-90.500 1.35295  
-90.000 1.32045  
-89.500 1.28786  
-89.000 1.25530  
-88.500 1.22290  
-88.000 1.19080  
-87.500 1.15912  
-87.000 1.12800  
-86.500 1.09759  
-86.000 1.06796  
-85.500 1.03906  
-85.000 1.01077  
-84.500 0.98299  
-84.000 0.95561  
-83.500 0.92852  
-83.000 0.90163  
-82.500 0.87487  
-82.000 0.84846  
-81.500 0.82267  
-81.000 0.79777  
-80.500 0.77404  
-80.000 0.75176  
-79.500 0.73119  
-79.000 0.71253  
-78.500 0.69554  
-78.000 0.67983  
-77.500 0.66504  
-77.000 0.65076  
-76.500 0.63662  
-76.000 0.62224  
-75.500 0.60731  
-75.000 0.59201

-74.500 0.57675  
-74.000 0.56192  
-73.500 0.54790  
-73.000 0.53509  
-72.500 0.52388  
-72.000 0.51461  
-71.500 0.50719  
-71.000 0.50136  
-70.500 0.49683  
-70.000 0.49332  
-69.500 0.49056  
-69.000 0.48825  
-68.500 0.48616  
-68.000 0.48427  
-67.500 0.48274  
-67.000 0.48171  
-66.500 0.48133  
-66.000 0.48175  
-65.500 0.48310  
-65.000 0.48554  
-64.500 0.48904  
-64.000 0.49347  
-63.500 0.49874  
-63.000 0.50471  
-62.500 0.51127  
-62.000 0.51829  
-61.500 0.52568  
-61.000 0.53342  
-60.500 0.54162  
-60.000 0.55038  
-59.500 0.55979  
-59.000 0.56996  
-58.500 0.58097  
-58.000 0.59293  
-57.500 0.60583  
-57.000 0.61957  
-56.500 0.63406  
-56.000 0.64920  
-55.500 0.66489  
-55.000 0.68104  
-54.500 0.69754  
-54.000 0.71436  
-53.500 0.73151  
-53.000 0.74900  
-52.500 0.76687  
-52.000 0.78511  
-51.500 0.80377  
-51.000 0.82284  
-50.500 0.84243  
-50.000 0.86269  
-49.500 0.88380  
-49.000 0.90594  
-48.500 0.92929  
-48.000 0.95400  
-47.500 0.98027  
-47.000 1.00807  
-46.500 1.03714  
-46.000 1.06718  
-45.500 1.09789  
-45.000 1.12897

-44.500 1.16012  
-44.000 1.19106  
-43.500 1.22157  
-43.000 1.25157  
-42.500 1.28102  
-42.000 1.30987  
-41.500 1.33807  
-41.000 1.36556  
-40.500 1.39230  
-40.000 1.41837  
-39.500 1.44415  
-39.000 1.47007  
-38.500 1.49656  
-38.000 1.52402  
-37.500 1.55289  
-37.000 1.58357  
-36.500 1.61627  
-36.000 1.65057  
-35.500 1.68597  
-35.000 1.72196  
-34.500 1.75805  
-34.000 1.79374  
-33.500 1.82853  
-33.000 1.86207  
-32.500 1.89450  
-32.000 1.92606  
-31.500 1.95696  
-31.000 1.98745  
-30.500 2.01775  
-30.000 2.04809  
-29.500 2.07867  
-29.000 2.10952  
-28.500 2.14067  
-28.000 2.17213  
-27.500 2.20393  
-27.000 2.23607  
-26.500 2.26857  
-26.000 2.30141  
-25.500 2.33433  
-25.000 2.36705  
-24.500 2.39925  
-24.000 2.43065  
-23.500 2.46094  
-23.000 2.48983  
-22.500 2.51712  
-22.000 2.54328  
-21.500 2.56896  
-21.000 2.59483  
-20.500 2.62155  
-20.000 2.64977  
-19.500 2.68016  
-19.000 2.71320  
-18.500 2.74821  
-18.000 2.78405  
-17.500 2.81956  
-17.000 2.85361  
-16.500 2.88506  
-16.000 2.91275  
-15.500 2.93573  
-15.000 2.95435

-14.500 2.96966  
-14.000 2.98266  
-13.500 2.99437  
-13.000 3.00583  
-12.500 3.01805  
-12.000 3.03198  
-11.500 3.04784  
-11.000 3.06546  
-10.500 3.08467  
-10.000 3.10527  
-9.500 3.12709  
-9.000 3.14995  
-8.500 3.17366  
-8.000 3.19788  
-7.500 3.22223  
-7.000 3.24627  
-6.500 3.26961  
-6.000 3.29184  
-5.500 3.31254  
-5.000 3.33133  
-4.500 3.34819  
-4.000 3.36343  
-3.500 3.37732  
-3.000 3.39017  
-2.500 3.40227  
-2.000 3.41392  
-1.500 3.42539  
-1.000 3.43663  
-0.500 3.44726  
0.000 3.45691  
0.500 3.46519  
1.000 3.47172  
1.500 3.47613  
2.000 3.47803  
2.500 3.47719  
3.000 3.47355  
3.500 3.46702  
4.000 3.45754  
4.500 3.44505  
5.000 3.42947  
5.500 3.41075  
6.000 3.38926  
6.500 3.36594  
7.000 3.34174  
7.500 3.31764  
8.000 3.29459  
8.500 3.27357  
9.000 3.25552  
9.500 3.24040  
10.000 3.22669  
10.500 3.21275  
11.000 3.19692  
11.500 3.17756  
12.000 3.15303  
12.500 3.12169  
13.000 3.08328  
13.500 3.03993  
14.000 2.99406  
14.500 2.94806  
15.000 2.90432

|        |         |
|--------|---------|
| 15.500 | 2.86526 |
| 16.000 | 2.83325 |
| 16.500 | 2.80929 |
| 17.000 | 2.79143 |
| 17.500 | 2.77731 |
| 18.000 | 2.76461 |
| 18.500 | 2.75099 |
| 19.000 | 2.73410 |
| 19.500 | 2.71161 |
| 20.000 | 2.68220 |
| 20.500 | 2.64709 |
| 21.000 | 2.60788 |
| 21.500 | 2.56619 |
| 22.000 | 2.52365 |
| 22.500 | 2.48186 |
| 23.000 | 2.44243 |
| 23.500 | 2.40649 |
| 24.000 | 2.37365 |
| 24.500 | 2.34326 |
| 25.000 | 2.31465 |
| 25.500 | 2.28716 |
| 26.000 | 2.26013 |
| 26.500 | 2.23290 |
| 27.000 | 2.20494 |
| 27.500 | 2.17624 |
| 28.000 | 2.14688 |
| 28.500 | 2.11697 |
| 29.000 | 2.08660 |
| 29.500 | 2.05586 |
| 30.000 | 2.02484 |
| 30.500 | 1.99360 |
| 31.000 | 1.96205 |
| 31.500 | 1.93004 |
| 32.000 | 1.89743 |
| 32.500 | 1.86409 |
| 33.000 | 1.82986 |
| 33.500 | 1.79462 |
| 34.000 | 1.75829 |
| 34.500 | 1.72126 |
| 35.000 | 1.68405 |
| 35.500 | 1.64716 |
| 36.000 | 1.61111 |
| 36.500 | 1.57642 |
| 37.000 | 1.54361 |
| 37.500 | 1.51308 |
| 38.000 | 1.48458 |
| 38.500 | 1.45756 |
| 39.000 | 1.43150 |
| 39.500 | 1.40586 |
| 40.000 | 1.38011 |
| 40.500 | 1.35370 |
| 41.000 | 1.32619 |
| 41.500 | 1.29770 |
| 42.000 | 1.26861 |
| 42.500 | 1.23933 |
| 43.000 | 1.21024 |
| 43.500 | 1.18175 |
| 44.000 | 1.15425 |
| 44.500 | 1.12808 |
| 45.000 | 1.10316 |

|        |         |
|--------|---------|
| 45.500 | 1.07912 |
| 46.000 | 1.05562 |
| 46.500 | 1.03230 |
| 47.000 | 1.00882 |
| 47.500 | 0.98481 |
| 48.000 | 0.95997 |
| 48.500 | 0.93441 |
| 49.000 | 0.90854 |
| 49.500 | 0.88278 |
| 50.000 | 0.85754 |
| 50.500 | 0.83325 |
| 51.000 | 0.81030 |
| 51.500 | 0.78910 |
| 52.000 | 0.76966 |
| 52.500 | 0.75171 |
| 53.000 | 0.73496 |
| 53.500 | 0.71912 |
| 54.000 | 0.70393 |
| 54.500 | 0.68909 |
| 55.000 | 0.67432 |
| 55.500 | 0.65953 |
| 56.000 | 0.64478 |
| 56.500 | 0.63013 |
| 57.000 | 0.61565 |
| 57.500 | 0.60138 |
| 58.000 | 0.58741 |
| 58.500 | 0.57380 |
| 59.000 | 0.56065 |
| 59.500 | 0.54813 |
| 60.000 | 0.53639 |
| 60.500 | 0.52561 |
| 61.000 | 0.51595 |
| 61.500 | 0.50756 |
| 62.000 | 0.50061 |
| 62.500 | 0.49509 |
| 63.000 | 0.49079 |
| 63.500 | 0.48747 |
| 64.000 | 0.48492 |
| 64.500 | 0.48291 |
| 65.000 | 0.48120 |
| 65.500 | 0.47958 |
| 66.000 | 0.47799 |
| 66.500 | 0.47664 |
| 67.000 | 0.47576 |
| 67.500 | 0.47559 |
| 68.000 | 0.47635 |
| 68.500 | 0.47828 |
| 69.000 | 0.48160 |
| 69.500 | 0.48637 |
| 70.000 | 0.49235 |
| 70.500 | 0.49925 |
| 71.000 | 0.50681 |
| 71.500 | 0.51474 |
| 72.000 | 0.52277 |
| 72.500 | 0.53062 |
| 73.000 | 0.53819 |
| 73.500 | 0.54576 |
| 74.000 | 0.55365 |
| 74.500 | 0.56218 |
| 75.000 | 0.57169 |

75.500 0.58248  
76.000 0.59488  
76.500 0.60908  
77.000 0.62493  
77.500 0.64223  
78.000 0.66077  
78.500 0.68036  
79.000 0.70079  
79.500 0.72187  
80.000 0.74342  
80.500 0.76539  
81.000 0.78775  
81.500 0.81047  
82.000 0.83352  
82.500 0.85687  
83.000 0.88048  
83.500 0.90438  
84.000 0.92883  
84.500 0.95412  
85.000 0.98057  
85.500 1.00847  
86.000 1.03814  
86.500 1.06986  
87.000 1.10381  
87.500 1.13957  
88.000 1.17655  
88.500 1.21417  
89.000 1.25184  
89.500 1.28898  
90.000 1.32501  
90.500 1.35948  
91.000 1.39276  
91.500 1.42543  
92.000 1.45810  
92.500 1.49138  
93.000 1.52588  
93.500 1.56218  
94.000 1.60075  
94.500 1.64109  
95.000 1.68233  
95.500 1.72359  
96.000 1.76400  
96.500 1.80269  
97.000 1.83879  
97.500 1.87159  
98.000 1.90173  
98.500 1.93048  
99.000 1.95912  
99.500 1.98891  
100.000 2.02112  
100.500 2.05704  
101.000 2.09772  
101.500 2.14240  
102.000 2.18925  
102.500 2.23643  
103.000 2.28212  
103.500 2.32449  
104.000 2.36170  
104.500 2.39211  
105.000 2.41637



105.500 2.43661  
106.000 2.45502  
106.500 2.47376  
107.000 2.49501  
107.500 2.52093  
108.000 2.55355  
108.500 2.59269  
109.000 2.63642  
109.500 2.68280  
110.000 2.72985  
110.500 2.77563  
111.000 2.81819  
111.500 2.85561  
112.000 2.88729  
112.500 2.91374  
113.000 2.93555  
113.500 2.95329  
114.000 2.96753  
114.500 2.97885  
115.000 2.98782  
115.500 2.99484  
116.000 3.00014  
116.500 3.00396  
117.000 3.00651  
117.500 3.00803  
118.000 3.00873  
118.500 3.00885  
119.000 3.00869  
119.500 3.00864  
120.000 3.00911  
120.500 3.01051  
121.000 3.01325  
121.500 3.01772  
122.000 3.02432  
122.500 3.03288  
123.000 3.04238  
123.500 3.05173  
124.000 3.05983  
124.500 3.06561  
125.000 3.06796  
125.500 3.06581  
126.000 3.05873  
126.500 3.04750  
127.000 3.03298  
127.500 3.01605  
128.000 2.99761  
128.500 2.97851  
129.000 2.95965  
129.500 2.94142  
130.000 2.92320  
130.500 2.90425  
131.000 2.88384  
131.500 2.86123  
132.000 2.83567  
132.500 2.80643  
133.000 2.77323  
133.500 2.73688  
134.000 2.69840  
134.500 2.65880  
135.000 2.61907

135.500 2.58023  
136.000 2.54328  
136.500 2.50883  
137.000 2.47632  
137.500 2.44499  
138.000 2.41404  
138.500 2.38270  
139.000 2.35020  
139.500 2.31576  
140.000 2.27882  
140.500 2.23962  
141.000 2.19857  
141.500 2.15610  
142.000 2.11262  
142.500 2.06854  
143.000 2.02428  
143.500 1.98023  
144.000 1.93662  
144.500 1.89364  
145.000 1.85148  
145.500 1.81034  
146.000 1.77041  
146.500 1.73188  
147.000 1.69487  
147.500 1.65904  
148.000 1.62394  
148.500 1.58909  
149.000 1.55404  
149.500 1.51831  
150.000 1.48145  
150.500 1.44305  
151.000 1.40322  
151.500 1.36223  
152.000 1.32038  
152.500 1.27793  
153.000 1.23517  
153.500 1.19239  
154.000 1.14985  
154.500 1.10772  
155.000 1.06613  
155.500 1.02519  
156.000 0.98503  
156.500 0.94578  
157.000 0.90754  
157.500 0.87043  
158.000 0.83443  
158.500 0.79943  
159.000 0.76535  
159.500 0.73207  
160.000 0.69950  
160.500 0.66755  
161.000 0.63611  
161.500 0.60517  
162.000 0.57474  
162.500 0.54485  
163.000 0.51551  
163.500 0.48674  
164.000 0.45857  
164.500 0.43102  
165.000 0.40406

165.500 0.37763  
166.000 0.35169  
166.500 0.32617  
167.000 0.30103  
167.500 0.27622  
168.000 0.25168  
168.500 0.22763  
169.000 0.20448  
169.500 0.18268  
170.000 0.16265  
170.500 0.14484  
171.000 0.12968  
171.500 0.11757  
172.000 0.10805  
172.500 0.09978  
173.000 0.09135  
173.500 0.08135  
174.000 0.06838  
174.500 0.05104  
175.000 0.03821  
175.500 0.03821  
176.000 0.03821  
176.500 0.03821  
177.000 0.03821  
177.500 0.03821  
178.000 0.03821  
178.500 0.03821  
179.000 0.03821  
179.500 0.03821

nonbonded AA

0.010 8.08150  
0.020 8.06300  
0.030 8.04450  
0.040 8.02600  
0.050 8.00750  
0.060 7.98900  
0.070 7.97050  
0.080 7.95200  
0.090 7.93350  
0.100 7.91500  
0.110 7.89650  
0.120 7.87800  
0.130 7.85950  
0.140 7.84100  
0.150 7.82250  
0.160 7.80400  
0.170 7.78550  
0.180 7.76700  
0.190 7.74850  
0.200 7.73000  
0.210 7.71150  
0.220 7.69300  
0.230 7.67450  
0.240 7.65600  
0.250 7.63750  
0.260 7.61900  
0.270 7.60050  
0.280 7.58200

0.290 7.56350  
0.300 7.54500  
0.310 7.52650  
0.320 7.50800  
0.330 7.48950  
0.340 7.47100  
0.350 7.45250  
0.360 7.43400  
0.370 7.41550  
0.380 7.39700  
0.390 7.37850  
0.400 7.36000  
0.410 7.34150  
0.420 7.32300  
0.430 7.30450  
0.440 7.28600  
0.450 7.26750  
0.460 7.24900  
0.470 7.23050  
0.480 7.21200  
0.490 7.19350  
0.500 7.17500  
0.510 7.15650  
0.520 7.13800  
0.530 7.11950  
0.540 7.10100  
0.550 7.08250  
0.560 7.06400  
0.570 7.04550  
0.580 7.02700  
0.590 7.00850  
0.600 6.99000  
0.610 6.97150  
0.620 6.95300  
0.630 6.93450  
0.640 6.91600  
0.650 6.89750  
0.660 6.87900  
0.670 6.86050  
0.680 6.84200  
0.690 6.82350  
0.700 6.80500  
0.710 6.78650  
0.720 6.76800  
0.730 6.74950  
0.740 6.73100  
0.750 6.71250  
0.760 6.69400  
0.770 6.67550  
0.780 6.65700  
0.790 6.63850  
0.800 6.62000  
0.810 6.60150  
0.820 6.58300  
0.830 6.56450  
0.840 6.54600  
0.850 6.52750  
0.860 6.50900  
0.870 6.49050  
0.880 6.47200

0.890 6.45350  
0.900 6.43500  
0.910 6.41650  
0.920 6.39800  
0.930 6.37950  
0.940 6.36100  
0.950 6.34250  
0.960 6.32400  
0.970 6.30550  
0.980 6.28700  
0.990 6.26850  
1.000 6.25000  
1.010 6.23150  
1.020 6.21300  
1.030 6.19450  
1.040 6.17600  
1.050 6.15750  
1.060 6.13900  
1.070 6.12050  
1.080 6.10200  
1.090 6.08350  
1.100 6.06500  
1.110 6.04650  
1.120 6.02800  
1.130 6.00950  
1.140 5.99100  
1.150 5.97250  
1.160 5.95400  
1.170 5.93550  
1.180 5.91700  
1.190 5.89850  
1.200 5.88000  
1.210 5.86150  
1.220 5.84300  
1.230 5.82450  
1.240 5.80600  
1.250 5.78750  
1.260 5.76900  
1.270 5.75050  
1.280 5.73200  
1.290 5.71350  
1.300 5.69500  
1.310 5.67650  
1.320 5.65800  
1.330 5.63950  
1.340 5.62100  
1.350 5.60250  
1.360 5.58400  
1.370 5.56550  
1.380 5.54700  
1.390 5.52850  
1.400 5.51000  
1.410 5.49150  
1.420 5.47300  
1.430 5.45450  
1.440 5.43600  
1.450 5.41750  
1.460 5.39900  
1.470 5.38050  
1.480 5.36200

1.490 5.34350  
1.500 5.32500  
1.510 5.30650  
1.520 5.28800  
1.530 5.26950  
1.540 5.25100  
1.550 5.23250  
1.560 5.21400  
1.570 5.19550  
1.580 5.17700  
1.590 5.15850  
1.600 5.14000  
1.610 5.12150  
1.620 5.10300  
1.630 5.08450  
1.640 5.06600  
1.650 5.04750  
1.660 5.02900  
1.670 5.01050  
1.680 4.99200  
1.690 4.97350  
1.700 4.95500  
1.710 4.93650  
1.720 4.91800  
1.730 4.89950  
1.740 4.88100  
1.750 4.86250  
1.760 4.84400  
1.770 4.82550  
1.780 4.80700  
1.790 4.78850  
1.800 4.77000  
1.810 4.75150  
1.820 4.73300  
1.830 4.71450  
1.840 4.69600  
1.850 4.67750  
1.860 4.65900  
1.870 4.64050  
1.880 4.62200  
1.890 4.60350  
1.900 4.58500  
1.910 4.56650  
1.920 4.54800  
1.930 4.52950  
1.940 4.51100  
1.950 4.49250  
1.960 4.47400  
1.970 4.45550  
1.980 4.43700  
1.990 4.41850  
2.000 4.40000  
2.010 4.38150  
2.020 4.36300  
2.030 4.34450  
2.040 4.32600  
2.050 4.30750  
2.060 4.28900  
2.070 4.27050  
2.080 4.25200

2.090 4.23350  
2.100 4.21500  
2.110 4.19650  
2.120 4.17800  
2.130 4.15950  
2.140 4.14100  
2.150 4.12250  
2.160 4.10400  
2.170 4.08550  
2.180 4.06700  
2.190 4.04850  
2.200 4.03000  
2.210 4.01150  
2.220 3.99300  
2.230 3.97450  
2.240 3.95600  
2.250 3.93750  
2.260 3.91900  
2.270 3.90050  
2.280 3.88200  
2.290 3.86350  
2.300 3.84500  
2.310 3.82650  
2.320 3.80800  
2.330 3.78950  
2.340 3.77100  
2.350 3.75250  
2.360 3.73400  
2.370 3.71550  
2.380 3.69700  
2.390 3.67850  
2.400 3.66000  
2.410 3.64150  
2.420 3.62300  
2.430 3.60450  
2.440 3.58600  
2.450 3.56750  
2.460 3.54900  
2.470 3.53050  
2.480 3.51200  
2.490 3.49350  
2.500 3.47500  
2.510 3.45650  
2.520 3.43800  
2.530 3.41950  
2.540 3.40100  
2.550 3.38250  
2.560 3.36400  
2.570 3.34550  
2.580 3.32700  
2.590 3.30850  
2.600 3.29000  
2.610 3.27150  
2.620 3.25300  
2.630 3.23450  
2.640 3.21600  
2.650 3.19750  
2.660 3.17900  
2.670 3.16050  
2.680 3.14200

2.690 3.12350  
2.700 3.10500  
2.710 3.08650  
2.720 3.06800  
2.730 3.04950  
2.740 3.03100  
2.750 3.01250  
2.760 2.99400  
2.770 2.97550  
2.780 2.95700  
2.790 2.93850  
2.800 2.92000  
2.810 2.90150  
2.820 2.88300  
2.830 2.86450  
2.840 2.84600  
2.850 2.82750  
2.860 2.80900  
2.870 2.79050  
2.880 2.77200  
2.890 2.75350  
2.900 2.73500  
2.910 2.71650  
2.920 2.69800  
2.930 2.67950  
2.940 2.66100  
2.950 2.64250  
2.960 2.62400  
2.970 2.60550  
2.980 2.58700  
2.990 2.56850  
3.000 2.55000  
3.010 2.53150  
3.020 2.51300  
3.030 2.49450  
3.040 2.47600  
3.050 2.45750  
3.060 2.43900  
3.070 2.42050  
3.080 2.40200  
3.090 2.38350  
3.100 2.36500  
3.110 2.34650  
3.120 2.32800  
3.130 2.30950  
3.140 2.29100  
3.150 2.27250  
3.160 2.25400  
3.170 2.23550  
3.180 2.21700  
3.190 2.19850  
3.200 2.18253  
3.210 2.15699  
3.220 2.12738  
3.230 2.09382  
3.240 2.05643  
3.250 2.01532  
3.260 1.97062  
3.270 1.92244  
3.280 1.87091



3.290 1.81614  
3.300 1.75826  
3.310 1.69738  
3.320 1.63362  
3.330 1.56710  
3.340 1.49794  
3.350 1.42626  
3.360 1.35217  
3.370 1.27581  
3.380 1.19728  
3.390 1.11671  
3.400 1.03421  
3.410 1.00733  
3.420 0.97881  
3.430 0.94881  
3.440 0.91750  
3.450 0.88504  
3.460 0.85160  
3.470 0.81734  
3.480 0.78242  
3.490 0.74701  
3.500 0.71127  
3.510 0.67537  
3.520 0.63947  
3.530 0.60374  
3.540 0.56834  
3.550 0.53343  
3.560 0.49919  
3.570 0.46576  
3.580 0.43332  
3.590 0.40204  
3.600 0.37207  
3.610 0.34354  
3.620 0.31643  
3.630 0.29069  
3.640 0.26623  
3.650 0.24302  
3.660 0.22097  
3.670 0.20004  
3.680 0.18017  
3.690 0.16128  
3.700 0.14333  
3.710 0.12624  
3.720 0.10996  
3.730 0.09443  
3.740 0.07958  
3.750 0.06535  
3.760 0.05169  
3.770 0.03853  
3.780 0.02582  
3.790 0.01348  
3.800 0.00146  
3.810 -0.01030  
3.820 -0.02179  
3.830 -0.03301  
3.840 -0.04395  
3.850 -0.05462  
3.860 -0.06500  
3.870 -0.07509  
3.880 -0.08487

3.890 -0.09436  
3.900 -0.10353  
3.910 -0.11239  
3.920 -0.12093  
3.930 -0.12914  
3.940 -0.13701  
3.950 -0.14455  
3.960 -0.15174  
3.970 -0.15858  
3.980 -0.16506  
3.990 -0.17118  
4.000 -0.17693  
4.010 -0.18231  
4.020 -0.18733  
4.030 -0.19199  
4.040 -0.19632  
4.050 -0.20031  
4.060 -0.20398  
4.070 -0.20735  
4.080 -0.21043  
4.090 -0.21321  
4.100 -0.21573  
4.110 -0.21798  
4.120 -0.21999  
4.130 -0.22175  
4.140 -0.22329  
4.150 -0.22460  
4.160 -0.22572  
4.170 -0.22664  
4.180 -0.22738  
4.190 -0.22794  
4.200 -0.22835  
4.210 -0.22860  
4.220 -0.22872  
4.230 -0.22869  
4.240 -0.22853  
4.250 -0.22825  
4.260 -0.22785  
4.270 -0.22733  
4.280 -0.22670  
4.290 -0.22597  
4.300 -0.22514  
4.310 -0.22422  
4.320 -0.22321  
4.330 -0.22212  
4.340 -0.22096  
4.350 -0.21972  
4.360 -0.21843  
4.370 -0.21707  
4.380 -0.21566  
4.390 -0.21421  
4.400 -0.21271  
4.410 -0.21118  
4.420 -0.20961  
4.430 -0.20801  
4.440 -0.20638  
4.450 -0.20472  
4.460 -0.20304  
4.470 -0.20134  
4.480 -0.19961

4.490 -0.19786  
4.500 -0.19609  
4.510 -0.19431  
4.520 -0.19251  
4.530 -0.19070  
4.540 -0.18888  
4.550 -0.18706  
4.560 -0.18522  
4.570 -0.18338  
4.580 -0.18154  
4.590 -0.17970  
4.600 -0.17786  
4.610 -0.17602  
4.620 -0.17418  
4.630 -0.17236  
4.640 -0.17053  
4.650 -0.16871  
4.660 -0.16690  
4.670 -0.16510  
4.680 -0.16330  
4.690 -0.16151  
4.700 -0.15973  
4.710 -0.15796  
4.720 -0.15620  
4.730 -0.15445  
4.740 -0.15271  
4.750 -0.15099  
4.760 -0.14927  
4.770 -0.14757  
4.780 -0.14589  
4.790 -0.14422  
4.800 -0.14256  
4.810 -0.14092  
4.820 -0.13930  
4.830 -0.13769  
4.840 -0.13610  
4.850 -0.13452  
4.860 -0.13296  
4.870 -0.13141  
4.880 -0.12988  
4.890 -0.12836  
4.900 -0.12686  
4.910 -0.12538  
4.920 -0.12390  
4.930 -0.12245  
4.940 -0.12100  
4.950 -0.11957  
4.960 -0.11816  
4.970 -0.11676  
4.980 -0.11537  
4.990 -0.11400  
5.000 -0.11264  
5.010 -0.11130  
5.020 -0.10997  
5.030 -0.10865  
5.040 -0.10734  
5.050 -0.10605  
5.060 -0.10477  
5.070 -0.10350  
5.080 -0.10224

5.090 -0.10099  
5.100 -0.09975  
5.110 -0.09853  
5.120 -0.09731  
5.130 -0.09610  
5.140 -0.09491  
5.150 -0.09372  
5.160 -0.09254  
5.170 -0.09136  
5.180 -0.09020  
5.190 -0.08904  
5.200 -0.08789  
5.210 -0.08675  
5.220 -0.08561  
5.230 -0.08448  
5.240 -0.08336  
5.250 -0.08225  
5.260 -0.08115  
5.270 -0.08005  
5.280 -0.07897  
5.290 -0.07789  
5.300 -0.07683  
5.310 -0.07577  
5.320 -0.07473  
5.330 -0.07370  
5.340 -0.07267  
5.350 -0.07167  
5.360 -0.07067  
5.370 -0.06969  
5.380 -0.06872  
5.390 -0.06776  
5.400 -0.06682  
5.410 -0.06589  
5.420 -0.06498  
5.430 -0.06408  
5.440 -0.06320  
5.450 -0.06233  
5.460 -0.06148  
5.470 -0.06064  
5.480 -0.05982  
5.490 -0.05901  
5.500 -0.05823  
5.510 -0.05745  
5.520 -0.05670  
5.530 -0.05596  
5.540 -0.05524  
5.550 -0.05454  
5.560 -0.05385  
5.570 -0.05319  
5.580 -0.05254  
5.590 -0.05190  
5.600 -0.05129  
5.610 -0.05070  
5.620 -0.05012  
5.630 -0.04956  
5.640 -0.04902  
5.650 -0.04849  
5.660 -0.04797  
5.670 -0.04747  
5.680 -0.04698

5.690 -0.04650  
5.700 -0.04603  
5.710 -0.04556  
5.720 -0.04511  
5.730 -0.04466  
5.740 -0.04421  
5.750 -0.04377  
5.760 -0.04333  
5.770 -0.04290  
5.780 -0.04246  
5.790 -0.04203  
5.800 -0.04159  
5.810 -0.04115  
5.820 -0.04072  
5.830 -0.04027  
5.840 -0.03983  
5.850 -0.03939  
5.860 -0.03894  
5.870 -0.03850  
5.880 -0.03805  
5.890 -0.03760  
5.900 -0.03716  
5.910 -0.03671  
5.920 -0.03626  
5.930 -0.03582  
5.940 -0.03537  
5.950 -0.03493  
5.960 -0.03449  
5.970 -0.03405  
5.980 -0.03361  
5.990 -0.03317  
6.000 -0.03273  
6.010 -0.03230  
6.020 -0.03187  
6.030 -0.03144  
6.040 -0.03101  
6.050 -0.03059  
6.060 -0.03017  
6.070 -0.02976  
6.080 -0.02935  
6.090 -0.02894  
6.100 -0.02854  
6.110 -0.02815  
6.120 -0.02775  
6.130 -0.02737  
6.140 -0.02699  
6.150 -0.02661  
6.160 -0.02624  
6.170 -0.02588  
6.180 -0.02553  
6.190 -0.02518  
6.200 -0.02484  
6.210 -0.02450  
6.220 -0.02418  
6.230 -0.02386  
6.240 -0.02354  
6.250 -0.02324  
6.260 -0.02294  
6.270 -0.02264  
6.280 -0.02235

6.290 -0.02207  
6.300 -0.02179  
6.310 -0.02152  
6.320 -0.02125  
6.330 -0.02098  
6.340 -0.02072  
6.350 -0.02046  
6.360 -0.02021  
6.370 -0.01996  
6.380 -0.01971  
6.390 -0.01947  
6.400 -0.01923  
6.410 -0.01899  
6.420 -0.01875  
6.430 -0.01852  
6.440 -0.01829  
6.450 -0.01806  
6.460 -0.01783  
6.470 -0.01760  
6.480 -0.01737  
6.490 -0.01715  
6.500 -0.01693  
6.510 -0.01671  
6.520 -0.01649  
6.530 -0.01627  
6.540 -0.01605  
6.550 -0.01583  
6.560 -0.01561  
6.570 -0.01540  
6.580 -0.01518  
6.590 -0.01497  
6.600 -0.01475  
6.610 -0.01454  
6.620 -0.01432  
6.630 -0.01411  
6.640 -0.01389  
6.650 -0.01368  
6.660 -0.01347  
6.670 -0.01326  
6.680 -0.01305  
6.690 -0.01284  
6.700 -0.01263  
6.710 -0.01243  
6.720 -0.01223  
6.730 -0.01202  
6.740 -0.01182  
6.750 -0.01163  
6.760 -0.01143  
6.770 -0.01124  
6.780 -0.01105  
6.790 -0.01087  
6.800 -0.01068  
6.810 -0.01050  
6.820 -0.01033  
6.830 -0.01015  
6.840 -0.00998  
6.850 -0.00981  
6.860 -0.00965  
6.870 -0.00948  
6.880 -0.00933

6.890 -0.00917  
6.900 -0.00901  
6.910 -0.00886  
6.920 -0.00871  
6.930 -0.00857  
6.940 -0.00842  
6.950 -0.00828  
6.960 -0.00814  
6.970 -0.00800  
6.980 -0.00787  
6.990 -0.00773  
7.000 -0.00760  
7.010 -0.00747  
7.020 -0.00734  
7.030 -0.00722  
7.040 -0.00709  
7.050 -0.00697  
7.060 -0.00684  
7.070 -0.00672  
7.080 -0.00660  
7.090 -0.00647  
7.100 -0.00635  
7.110 -0.00622  
7.120 -0.00609  
7.130 -0.00596  
7.140 -0.00583  
7.150 -0.00570  
7.160 -0.00556  
7.170 -0.00543  
7.180 -0.00529  
7.190 -0.00514  
7.200 -0.00499  
7.210 -0.00484  
7.220 -0.00469  
7.230 -0.00453  
7.240 -0.00437  
7.250 -0.00421  
7.260 -0.00404  
7.270 -0.00388  
7.280 -0.00371  
7.290 -0.00354  
7.300 -0.00337  
7.310 -0.00321  
7.320 -0.00304  
7.330 -0.00288  
7.340 -0.00271  
7.350 -0.00255  
7.360 -0.00240  
7.370 -0.00224  
7.380 -0.00209  
7.390 -0.00194  
7.400 -0.00180  
7.410 -0.00166  
7.420 -0.00152  
7.430 -0.00140  
7.440 -0.00127  
7.450 -0.00115  
7.460 -0.00104  
7.470 -0.00093  
7.480 -0.00082

7.490 -0.00072  
7.500 -0.00062  
7.510 -0.00053  
7.520 -0.00045  
7.530 -0.00037  
7.540 -0.00029  
7.550 -0.00022  
7.560 -0.00016  
7.570 -0.00010  
7.580 -0.00004  
7.590 0.00001  
7.600 0.00005  
7.610 0.00009  
7.620 0.00013  
7.630 0.00016  
7.640 0.00018  
7.650 0.00020  
7.660 0.00022  
7.670 0.00023  
7.680 0.00024  
7.690 0.00024  
7.700 0.00024  
7.710 0.00023  
7.720 0.00022  
7.730 0.00021  
7.740 0.00020  
7.750 0.00017  
7.760 0.00015  
7.770 0.00012  
7.780 0.00009  
7.790 0.00006  
7.800 0.00003  
7.810 -0.00001  
7.820 -0.00005  
7.830 -0.00010  
7.840 -0.00015  
7.850 -0.00020  
7.860 -0.00025  
7.870 -0.00030  
7.880 -0.00036  
7.890 -0.00042  
7.900 -0.00048  
7.910 -0.00054  
7.920 -0.00061  
7.930 -0.00068  
7.940 -0.00075  
7.950 -0.00083  
7.960 -0.00090  
7.970 -0.00098  
7.980 -0.00106  
7.990 -0.00114  
8.000 -0.00123  
8.010 -0.00131  
8.020 -0.00140  
8.030 -0.00149  
8.040 -0.00158  
8.050 -0.00167  
8.060 -0.00176  
8.070 -0.00185  
8.080 -0.00194



8.090 -0.00203  
8.100 -0.00211  
8.110 -0.00220  
8.120 -0.00228  
8.130 -0.00236  
8.140 -0.00243  
8.150 -0.00251  
8.160 -0.00258  
8.170 -0.00264  
8.180 -0.00270  
8.190 -0.00276  
8.200 -0.00280  
8.210 -0.00285  
8.220 -0.00289  
8.230 -0.00292  
8.240 -0.00294  
8.250 -0.00296  
8.260 -0.00297  
8.270 -0.00297  
8.280 -0.00296  
8.290 -0.00295  
8.300 -0.00292  
8.310 -0.00289  
8.320 -0.00285  
8.330 -0.00280  
8.340 -0.00274  
8.350 -0.00267  
8.360 -0.00259  
8.370 -0.00250  
8.380 -0.00239  
8.390 -0.00228  
8.400 -0.00215  
8.410 -0.00202  
8.420 -0.00187  
8.430 -0.00171  
8.440 -0.00154  
8.450 -0.00137  
8.460 -0.00119  
8.470 -0.00100  
8.480 -0.00081  
8.490 -0.00062  
8.500 -0.00042  
8.510 -0.00022  
8.520 -0.00002  
8.530 0.00018  
8.540 0.00037  
8.550 0.00057  
8.560 0.00076  
8.570 0.00094  
8.580 0.00112  
8.590 0.00129  
8.600 0.00145  
8.610 0.00161  
8.620 0.00175  
8.630 0.00189  
8.640 0.00202  
8.650 0.00214  
8.660 0.00225  
8.670 0.00236  
8.680 0.00247

8.690 0.00256  
8.700 0.00266  
8.710 0.00274  
8.720 0.00283  
8.730 0.00291  
8.740 0.00298  
8.750 0.00306  
8.760 0.00313  
8.770 0.00320  
8.780 0.00327  
8.790 0.00334  
8.800 0.00341  
8.810 0.00348  
8.820 0.00355  
8.830 0.00362  
8.840 0.00369  
8.850 0.00376  
8.860 0.00384  
8.870 0.00391  
8.880 0.00399  
8.890 0.00407  
8.900 0.00415  
8.910 0.00423  
8.920 0.00431  
8.930 0.00440  
8.940 0.00449  
8.950 0.00458  
8.960 0.00468  
8.970 0.00478  
8.980 0.00488  
8.990 0.00499  
9.000 0.00509  
9.010 0.00521  
9.020 0.00532  
9.030 0.00544  
9.040 0.00556  
9.050 0.00568  
9.060 0.00581  
9.070 0.00593  
9.080 0.00605  
9.090 0.00616  
9.100 0.00628  
9.110 0.00639  
9.120 0.00649  
9.130 0.00659  
9.140 0.00669  
9.150 0.00678  
9.160 0.00686  
9.170 0.00693  
9.180 0.00699  
9.190 0.00705  
9.200 0.00709  
9.210 0.00712  
9.220 0.00714  
9.230 0.00715  
9.240 0.00715  
9.250 0.00714  
9.260 0.00713  
9.270 0.00710  
9.280 0.00707

9.290 0.00703  
9.300 0.00699  
9.310 0.00694  
9.320 0.00688  
9.330 0.00682  
9.340 0.00676  
9.350 0.00670  
9.360 0.00663  
9.370 0.00656  
9.380 0.00649  
9.390 0.00642  
9.400 0.00634  
9.410 0.00627  
9.420 0.00620  
9.430 0.00613  
9.440 0.00607  
9.450 0.00600  
9.460 0.00594  
9.470 0.00588  
9.480 0.00583  
9.490 0.00578  
9.500 0.00573  
9.510 0.00569  
9.520 0.00565  
9.530 0.00563  
9.540 0.00560  
9.550 0.00559  
9.560 0.00558  
9.570 0.00558  
9.580 0.00559  
9.590 0.00560  
9.600 0.00563  
9.610 0.00566  
9.620 0.00571  
9.630 0.00576  
9.640 0.00582  
9.650 0.00588  
9.660 0.00595  
9.670 0.00603  
9.680 0.00611  
9.690 0.00619  
9.700 0.00628  
9.710 0.00636  
9.720 0.00645  
9.730 0.00653  
9.740 0.00662  
9.750 0.00670  
9.760 0.00678  
9.770 0.00686  
9.780 0.00693  
9.790 0.00699  
9.800 0.00705  
9.810 0.00711  
9.820 0.00715  
9.830 0.00719  
9.840 0.00722  
9.850 0.00724  
9.860 0.00726  
9.870 0.00727  
9.880 0.00728

9.890 0.00727  
9.900 0.00726  
9.910 0.00724  
9.920 0.00722  
9.930 0.00719  
9.940 0.00715  
9.950 0.00710  
9.960 0.00705  
9.970 0.00699  
9.980 0.00693  
9.990 0.00685  
10.000 0.00678  
10.010 0.00669  
10.020 0.00660  
10.030 0.00650  
10.040 0.00640  
10.050 0.00629  
10.060 0.00619  
10.070 0.00608  
10.080 0.00597  
10.090 0.00585  
10.100 0.00574  
10.110 0.00563  
10.120 0.00552  
10.130 0.00541  
10.140 0.00531  
10.150 0.00521  
10.160 0.00511  
10.170 0.00503  
10.180 0.00494  
10.190 0.00487  
10.200 0.00480  
10.210 0.00474  
10.220 0.00468  
10.230 0.00464  
10.240 0.00460  
10.250 0.00457  
10.260 0.00455  
10.270 0.00453  
10.280 0.00452  
10.290 0.00452  
10.300 0.00451  
10.310 0.00452  
10.320 0.00453  
10.330 0.00454  
10.340 0.00456  
10.350 0.00458  
10.360 0.00460  
10.370 0.00463  
10.380 0.00466  
10.390 0.00469  
10.400 0.00472  
10.410 0.00475  
10.420 0.00479  
10.430 0.00482  
10.440 0.00486  
10.450 0.00489  
10.460 0.00492  
10.470 0.00494  
10.480 0.00496

10.490 0.00498  
10.500 0.00499  
10.510 0.00500  
10.520 0.00500  
10.530 0.00499  
10.540 0.00498  
10.550 0.00496  
10.560 0.00492  
10.570 0.00488  
10.580 0.00483  
10.590 0.00476  
10.600 0.00468  
10.610 0.00459  
10.620 0.00449  
10.630 0.00438  
10.640 0.00425  
10.650 0.00412  
10.660 0.00398  
10.670 0.00384  
10.680 0.00369  
10.690 0.00353  
10.700 0.00337  
10.710 0.00321  
10.720 0.00304  
10.730 0.00288  
10.740 0.00272  
10.750 0.00256  
10.760 0.00240  
10.770 0.00224  
10.780 0.00209  
10.790 0.00195  
10.800 0.00181  
10.810 0.00168  
10.820 0.00156  
10.830 0.00145  
10.840 0.00134  
10.850 0.00124  
10.860 0.00114  
10.870 0.00105  
10.880 0.00096  
10.890 0.00087  
10.900 0.00079  
10.910 0.00071  
10.920 0.00063  
10.930 0.00055  
10.940 0.00048  
10.950 0.00040  
10.960 0.00032  
10.970 0.00025  
10.980 0.00017  
10.990 0.00008  
11.000 0.00000

nonbonded AB

0.010 8.38150  
0.020 8.36300  
0.030 8.34450  
0.040 8.32600  
0.050 8.30750

0.060 8.28900  
0.070 8.27050  
0.080 8.25200  
0.090 8.23350  
0.100 8.21500  
0.110 8.19650  
0.120 8.17800  
0.130 8.15950  
0.140 8.14100  
0.150 8.12250  
0.160 8.10400  
0.170 8.08550  
0.180 8.06700  
0.190 8.04850  
0.200 8.03000  
0.210 8.01150  
0.220 7.99300  
0.230 7.97450  
0.240 7.95600  
0.250 7.93750  
0.260 7.91900  
0.270 7.90050  
0.280 7.88200  
0.290 7.86350  
0.300 7.84500  
0.310 7.82650  
0.320 7.80800  
0.330 7.78950  
0.340 7.77100  
0.350 7.75250  
0.360 7.73400  
0.370 7.71550  
0.380 7.69700  
0.390 7.67850  
0.400 7.66000  
0.410 7.64150  
0.420 7.62300  
0.430 7.60450  
0.440 7.58600  
0.450 7.56750  
0.460 7.54900  
0.470 7.53050  
0.480 7.51200  
0.490 7.49350  
0.500 7.47500  
0.510 7.45650  
0.520 7.43800  
0.530 7.41950  
0.540 7.40100  
0.550 7.38250  
0.560 7.36400  
0.570 7.34550  
0.580 7.32700  
0.590 7.30850  
0.600 7.29000  
0.610 7.27150  
0.620 7.25300  
0.630 7.23450  
0.640 7.21600  
0.650 7.19750

0.660 7.17900  
0.670 7.16050  
0.680 7.14200  
0.690 7.12350  
0.700 7.10500  
0.710 7.08650  
0.720 7.06800  
0.730 7.04950  
0.740 7.03100  
0.750 7.01250  
0.760 6.99400  
0.770 6.97550  
0.780 6.95700  
0.790 6.93850  
0.800 6.92000  
0.810 6.90150  
0.820 6.88300  
0.830 6.86450  
0.840 6.84600  
0.850 6.82750  
0.860 6.80900  
0.870 6.79050  
0.880 6.77200  
0.890 6.75350  
0.900 6.73500  
0.910 6.71650  
0.920 6.69800  
0.930 6.67950  
0.940 6.66100  
0.950 6.64250  
0.960 6.62400  
0.970 6.60550  
0.980 6.58700  
0.990 6.56850  
1.000 6.55000  
1.010 6.53150  
1.020 6.51300  
1.030 6.49450  
1.040 6.47600  
1.050 6.45750  
1.060 6.43900  
1.070 6.42050  
1.080 6.40200  
1.090 6.38350  
1.100 6.36500  
1.110 6.34650  
1.120 6.32800  
1.130 6.30950  
1.140 6.29100  
1.150 6.27250  
1.160 6.25400  
1.170 6.23550  
1.180 6.21700  
1.190 6.19850  
1.200 6.18000  
1.210 6.16150  
1.220 6.14300  
1.230 6.12450  
1.240 6.10600  
1.250 6.08750

1.260 6.06900  
1.270 6.05050  
1.280 6.03200  
1.290 6.01350  
1.300 5.99500  
1.310 5.97650  
1.320 5.95800  
1.330 5.93950  
1.340 5.92100  
1.350 5.90250  
1.360 5.88400  
1.370 5.86550  
1.380 5.84700  
1.390 5.82850  
1.400 5.81000  
1.410 5.79150  
1.420 5.77300  
1.430 5.75450  
1.440 5.73600  
1.450 5.71750  
1.460 5.69900  
1.470 5.68050  
1.480 5.66200  
1.490 5.64350  
1.500 5.62500  
1.510 5.60650  
1.520 5.58800  
1.530 5.56950  
1.540 5.55100  
1.550 5.53250  
1.560 5.51400  
1.570 5.49550  
1.580 5.47700  
1.590 5.45850  
1.600 5.44000  
1.610 5.42150  
1.620 5.40300  
1.630 5.38450  
1.640 5.36600  
1.650 5.34750  
1.660 5.32900  
1.670 5.31050  
1.680 5.29200  
1.690 5.27350  
1.700 5.25500  
1.710 5.23650  
1.720 5.21800  
1.730 5.19950  
1.740 5.18100  
1.750 5.16250  
1.760 5.14400  
1.770 5.12550  
1.780 5.10700  
1.790 5.08850  
1.800 5.07000  
1.810 5.05150  
1.820 5.03300  
1.830 5.01450  
1.840 4.99600  
1.850 4.97750



1.860 4.95900  
1.870 4.94050  
1.880 4.92200  
1.890 4.90350  
1.900 4.88500  
1.910 4.86650  
1.920 4.84800  
1.930 4.82950  
1.940 4.81100  
1.950 4.79250  
1.960 4.77400  
1.970 4.75550  
1.980 4.73700  
1.990 4.71850  
2.000 4.70000  
2.010 4.68150  
2.020 4.66300  
2.030 4.64450  
2.040 4.62600  
2.050 4.60750  
2.060 4.58900  
2.070 4.57050  
2.080 4.55200  
2.090 4.53350  
2.100 4.51500  
2.110 4.49650  
2.120 4.47800  
2.130 4.45950  
2.140 4.44100  
2.150 4.42250  
2.160 4.40400  
2.170 4.38550  
2.180 4.36700  
2.190 4.34850  
2.200 4.33000  
2.210 4.31150  
2.220 4.29300  
2.230 4.27450  
2.240 4.25600  
2.250 4.23750  
2.260 4.21900  
2.270 4.20050  
2.280 4.18200  
2.290 4.16350  
2.300 4.14500  
2.310 4.12650  
2.320 4.10800  
2.330 4.08950  
2.340 4.07100  
2.350 4.05250  
2.360 4.03400  
2.370 4.01550  
2.380 3.99700  
2.390 3.97850  
2.400 3.96000  
2.410 3.94150  
2.420 3.92300  
2.430 3.90450  
2.440 3.88600  
2.450 3.86750

2.460 3.84900  
2.470 3.83050  
2.480 3.81200  
2.490 3.79350  
2.500 3.77500  
2.510 3.75650  
2.520 3.73800  
2.530 3.71950  
2.540 3.70100  
2.550 3.68250  
2.560 3.66400  
2.570 3.64550  
2.580 3.62700  
2.590 3.60850  
2.600 3.59000  
2.610 3.57150  
2.620 3.55300  
2.630 3.53450  
2.640 3.51600  
2.650 3.49750  
2.660 3.47900  
2.670 3.46050  
2.680 3.44200  
2.690 3.42350  
2.700 3.40500  
2.710 3.38650  
2.720 3.36800  
2.730 3.34950  
2.740 3.33100  
2.750 3.31250  
2.760 3.29400  
2.770 3.27550  
2.780 3.25700  
2.790 3.23850  
2.800 3.22000  
2.810 3.20150  
2.820 3.18300  
2.830 3.16450  
2.840 3.14600  
2.850 3.12750  
2.860 3.10900  
2.870 3.09050  
2.880 3.07200  
2.890 3.05350  
2.900 3.03500  
2.910 3.01650  
2.920 2.99800  
2.930 2.97950  
2.940 2.96100  
2.950 2.94250  
2.960 2.92400  
2.970 2.90550  
2.980 2.88700  
2.990 2.86850  
3.000 2.85000  
3.010 2.83150  
3.020 2.81300  
3.030 2.79450  
3.040 2.77600  
3.050 2.75750

3.060 2.73900  
3.070 2.72050  
3.080 2.70200  
3.090 2.68350  
3.100 2.66500  
3.110 2.64650  
3.120 2.62800  
3.130 2.60950  
3.140 2.59100  
3.150 2.57250  
3.160 2.55400  
3.170 2.53550  
3.180 2.51700  
3.190 2.49850  
3.200 2.45983  
3.210 2.43522  
3.220 2.40617  
3.230 2.37281  
3.240 2.33527  
3.250 2.29368  
3.260 2.24818  
3.270 2.19888  
3.280 2.14591  
3.290 2.08941  
3.300 2.02951  
3.310 1.96633  
3.320 1.90000  
3.330 1.83066  
3.340 1.75842  
3.350 1.68342  
3.360 1.60579  
3.370 1.52565  
3.380 1.44314  
3.390 1.35838  
3.400 1.27151  
3.410 1.24207  
3.420 1.21082  
3.430 1.17793  
3.440 1.14359  
3.450 1.10796  
3.460 1.07122  
3.470 1.03356  
3.480 0.99514  
3.490 0.95614  
3.500 0.91675  
3.510 0.87713  
3.520 0.83746  
3.530 0.79792  
3.540 0.75868  
3.550 0.71992  
3.560 0.68183  
3.570 0.64456  
3.580 0.60831  
3.590 0.57324  
3.600 0.53954  
3.610 0.50734  
3.620 0.47661  
3.630 0.44730  
3.640 0.41935  
3.650 0.39269

3.660 0.36726  
3.670 0.34301  
3.680 0.31986  
3.690 0.29776  
3.700 0.27664  
3.710 0.25645  
3.720 0.23713  
3.730 0.21860  
3.740 0.20082  
3.750 0.18371  
3.760 0.16722  
3.770 0.15128  
3.780 0.13584  
3.790 0.12083  
3.800 0.10619  
3.810 0.09187  
3.820 0.07787  
3.830 0.06419  
3.840 0.05083  
3.850 0.03780  
3.860 0.02511  
3.870 0.01276  
3.880 0.00075  
3.890 -0.01090  
3.900 -0.02220  
3.910 -0.03313  
3.920 -0.04370  
3.930 -0.05389  
3.940 -0.06371  
3.950 -0.07314  
3.960 -0.08219  
3.970 -0.09084  
3.980 -0.09909  
3.990 -0.10693  
4.000 -0.11437  
4.010 -0.12139  
4.020 -0.12801  
4.030 -0.13424  
4.040 -0.14008  
4.050 -0.14556  
4.060 -0.15068  
4.070 -0.15545  
4.080 -0.15989  
4.090 -0.16400  
4.100 -0.16780  
4.110 -0.17130  
4.120 -0.17451  
4.130 -0.17745  
4.140 -0.18011  
4.150 -0.18253  
4.160 -0.18469  
4.170 -0.18663  
4.180 -0.18835  
4.190 -0.18985  
4.200 -0.19116  
4.210 -0.19229  
4.220 -0.19323  
4.230 -0.19400  
4.240 -0.19460  
4.250 -0.19505

4.260 -0.19534  
4.270 -0.19548  
4.280 -0.19548  
4.290 -0.19535  
4.300 -0.19510  
4.310 -0.19472  
4.320 -0.19423  
4.330 -0.19364  
4.340 -0.19294  
4.350 -0.19215  
4.360 -0.19127  
4.370 -0.19031  
4.380 -0.18928  
4.390 -0.18818  
4.400 -0.18702  
4.410 -0.18581  
4.420 -0.18454  
4.430 -0.18323  
4.440 -0.18187  
4.450 -0.18047  
4.460 -0.17903  
4.470 -0.17755  
4.480 -0.17605  
4.490 -0.17451  
4.500 -0.17294  
4.510 -0.17135  
4.520 -0.16974  
4.530 -0.16812  
4.540 -0.16647  
4.550 -0.16482  
4.560 -0.16315  
4.570 -0.16148  
4.580 -0.15981  
4.590 -0.15814  
4.600 -0.15647  
4.610 -0.15481  
4.620 -0.15315  
4.630 -0.15150  
4.640 -0.14986  
4.650 -0.14823  
4.660 -0.14662  
4.670 -0.14501  
4.680 -0.14341  
4.690 -0.14183  
4.700 -0.14026  
4.710 -0.13870  
4.720 -0.13716  
4.730 -0.13564  
4.740 -0.13414  
4.750 -0.13265  
4.760 -0.13118  
4.770 -0.12973  
4.780 -0.12830  
4.790 -0.12689  
4.800 -0.12551  
4.810 -0.12414  
4.820 -0.12280  
4.830 -0.12149  
4.840 -0.12019  
4.850 -0.11891

4.860 -0.11765  
4.870 -0.11641  
4.880 -0.11518  
4.890 -0.11398  
4.900 -0.11278  
4.910 -0.11161  
4.920 -0.11045  
4.930 -0.10930  
4.940 -0.10816  
4.950 -0.10704  
4.960 -0.10592  
4.970 -0.10482  
4.980 -0.10372  
4.990 -0.10264  
5.000 -0.10156  
5.010 -0.10049  
5.020 -0.09942  
5.030 -0.09837  
5.040 -0.09731  
5.050 -0.09627  
5.060 -0.09524  
5.070 -0.09421  
5.080 -0.09319  
5.090 -0.09218  
5.100 -0.09117  
5.110 -0.09017  
5.120 -0.08918  
5.130 -0.08820  
5.140 -0.08723  
5.150 -0.08626  
5.160 -0.08531  
5.170 -0.08436  
5.180 -0.08342  
5.190 -0.08249  
5.200 -0.08157  
5.210 -0.08066  
5.220 -0.07975  
5.230 -0.07886  
5.240 -0.07797  
5.250 -0.07709  
5.260 -0.07622  
5.270 -0.07536  
5.280 -0.07451  
5.290 -0.07367  
5.300 -0.07283  
5.310 -0.07201  
5.320 -0.07119  
5.330 -0.07038  
5.340 -0.06958  
5.350 -0.06878  
5.360 -0.06800  
5.370 -0.06722  
5.380 -0.06646  
5.390 -0.06570  
5.400 -0.06494  
5.410 -0.06420  
5.420 -0.06346  
5.430 -0.06274  
5.440 -0.06202  
5.450 -0.06131

5.460 -0.06061  
5.470 -0.05992  
5.480 -0.05924  
5.490 -0.05857  
5.500 -0.05792  
5.510 -0.05727  
5.520 -0.05663  
5.530 -0.05601  
5.540 -0.05540  
5.550 -0.05480  
5.560 -0.05421  
5.570 -0.05364  
5.580 -0.05308  
5.590 -0.05253  
5.600 -0.05199  
5.610 -0.05147  
5.620 -0.05097  
5.630 -0.05047  
5.640 -0.04999  
5.650 -0.04952  
5.660 -0.04906  
5.670 -0.04860  
5.680 -0.04816  
5.690 -0.04772  
5.700 -0.04729  
5.710 -0.04686  
5.720 -0.04643  
5.730 -0.04601  
5.740 -0.04560  
5.750 -0.04518  
5.760 -0.04477  
5.770 -0.04435  
5.780 -0.04394  
5.790 -0.04352  
5.800 -0.04310  
5.810 -0.04267  
5.820 -0.04225  
5.830 -0.04182  
5.840 -0.04139  
5.850 -0.04095  
5.860 -0.04052  
5.870 -0.04008  
5.880 -0.03965  
5.890 -0.03922  
5.900 -0.03879  
5.910 -0.03836  
5.920 -0.03793  
5.930 -0.03751  
5.940 -0.03709  
5.950 -0.03667  
5.960 -0.03626  
5.970 -0.03585  
5.980 -0.03545  
5.990 -0.03506  
6.000 -0.03467  
6.010 -0.03429  
6.020 -0.03392  
6.030 -0.03355  
6.040 -0.03320  
6.050 -0.03285

6.060 -0.03251  
6.070 -0.03217  
6.080 -0.03184  
6.090 -0.03152  
6.100 -0.03121  
6.110 -0.03090  
6.120 -0.03060  
6.130 -0.03031  
6.140 -0.03002  
6.150 -0.02974  
6.160 -0.02947  
6.170 -0.02920  
6.180 -0.02894  
6.190 -0.02869  
6.200 -0.02844  
6.210 -0.02820  
6.220 -0.02796  
6.230 -0.02773  
6.240 -0.02751  
6.250 -0.02728  
6.260 -0.02706  
6.270 -0.02685  
6.280 -0.02663  
6.290 -0.02641  
6.300 -0.02620  
6.310 -0.02598  
6.320 -0.02576  
6.330 -0.02554  
6.340 -0.02531  
6.350 -0.02509  
6.360 -0.02485  
6.370 -0.02462  
6.380 -0.02437  
6.390 -0.02412  
6.400 -0.02386  
6.410 -0.02360  
6.420 -0.02332  
6.430 -0.02304  
6.440 -0.02276  
6.450 -0.02247  
6.460 -0.02217  
6.470 -0.02188  
6.480 -0.02158  
6.490 -0.02128  
6.500 -0.02098  
6.510 -0.02068  
6.520 -0.02038  
6.530 -0.02008  
6.540 -0.01979  
6.550 -0.01950  
6.560 -0.01921  
6.570 -0.01894  
6.580 -0.01866  
6.590 -0.01840  
6.600 -0.01814  
6.610 -0.01789  
6.620 -0.01766  
6.630 -0.01743  
6.640 -0.01721  
6.650 -0.01699



6.660 -0.01679  
6.670 -0.01659  
6.680 -0.01641  
6.690 -0.01623  
6.700 -0.01606  
6.710 -0.01589  
6.720 -0.01574  
6.730 -0.01559  
6.740 -0.01545  
6.750 -0.01531  
6.760 -0.01519  
6.770 -0.01507  
6.780 -0.01495  
6.790 -0.01485  
6.800 -0.01475  
6.810 -0.01465  
6.820 -0.01456  
6.830 -0.01448  
6.840 -0.01440  
6.850 -0.01433  
6.860 -0.01426  
6.870 -0.01419  
6.880 -0.01413  
6.890 -0.01406  
6.900 -0.01400  
6.910 -0.01394  
6.920 -0.01388  
6.930 -0.01382  
6.940 -0.01376  
6.950 -0.01370  
6.960 -0.01363  
6.970 -0.01357  
6.980 -0.01350  
6.990 -0.01342  
7.000 -0.01335  
7.010 -0.01326  
7.020 -0.01318  
7.030 -0.01309  
7.040 -0.01299  
7.050 -0.01289  
7.060 -0.01279  
7.070 -0.01269  
7.080 -0.01258  
7.090 -0.01247  
7.100 -0.01235  
7.110 -0.01224  
7.120 -0.01212  
7.130 -0.01200  
7.140 -0.01187  
7.150 -0.01175  
7.160 -0.01162  
7.170 -0.01149  
7.180 -0.01137  
7.190 -0.01124  
7.200 -0.01110  
7.210 -0.01097  
7.220 -0.01084  
7.230 -0.01071  
7.240 -0.01058  
7.250 -0.01046

7.260 -0.01033  
7.270 -0.01021  
7.280 -0.01009  
7.290 -0.00997  
7.300 -0.00986  
7.310 -0.00975  
7.320 -0.00965  
7.330 -0.00956  
7.340 -0.00947  
7.350 -0.00939  
7.360 -0.00931  
7.370 -0.00925  
7.380 -0.00919  
7.390 -0.00914  
7.400 -0.00910  
7.410 -0.00907  
7.420 -0.00906  
7.430 -0.00905  
7.440 -0.00905  
7.450 -0.00906  
7.460 -0.00908  
7.470 -0.00910  
7.480 -0.00914  
7.490 -0.00919  
7.500 -0.00924  
7.510 -0.00931  
7.520 -0.00938  
7.530 -0.00945  
7.540 -0.00954  
7.550 -0.00963  
7.560 -0.00974  
7.570 -0.00984  
7.580 -0.00996  
7.590 -0.01008  
7.600 -0.01021  
7.610 -0.01034  
7.620 -0.01048  
7.630 -0.01062  
7.640 -0.01077  
7.650 -0.01092  
7.660 -0.01107  
7.670 -0.01122  
7.680 -0.01137  
7.690 -0.01151  
7.700 -0.01165  
7.710 -0.01179  
7.720 -0.01192  
7.730 -0.01205  
7.740 -0.01216  
7.750 -0.01227  
7.760 -0.01237  
7.770 -0.01246  
7.780 -0.01253  
7.790 -0.01260  
7.800 -0.01264  
7.810 -0.01268  
7.820 -0.01270  
7.830 -0.01270  
7.840 -0.01269  
7.850 -0.01267

7.860 -0.01263  
7.870 -0.01258  
7.880 -0.01252  
7.890 -0.01245  
7.900 -0.01237  
7.910 -0.01228  
7.920 -0.01218  
7.930 -0.01207  
7.940 -0.01195  
7.950 -0.01182  
7.960 -0.01169  
7.970 -0.01155  
7.980 -0.01140  
7.990 -0.01125  
8.000 -0.01109  
8.010 -0.01093  
8.020 -0.01076  
8.030 -0.01059  
8.040 -0.01042  
8.050 -0.01025  
8.060 -0.01007  
8.070 -0.00990  
8.080 -0.00973  
8.090 -0.00956  
8.100 -0.00939  
8.110 -0.00922  
8.120 -0.00906  
8.130 -0.00890  
8.140 -0.00874  
8.150 -0.00860  
8.160 -0.00846  
8.170 -0.00832  
8.180 -0.00820  
8.190 -0.00808  
8.200 -0.00798  
8.210 -0.00788  
8.220 -0.00780  
8.230 -0.00772  
8.240 -0.00765  
8.250 -0.00759  
8.260 -0.00754  
8.270 -0.00750  
8.280 -0.00746  
8.290 -0.00743  
8.300 -0.00741  
8.310 -0.00739  
8.320 -0.00737  
8.330 -0.00736  
8.340 -0.00736  
8.350 -0.00735  
8.360 -0.00735  
8.370 -0.00735  
8.380 -0.00735  
8.390 -0.00735  
8.400 -0.00735  
8.410 -0.00736  
8.420 -0.00736  
8.430 -0.00736  
8.440 -0.00736  
8.450 -0.00736

8.460 -0.00736  
8.470 -0.00736  
8.480 -0.00735  
8.490 -0.00735  
8.500 -0.00734  
8.510 -0.00733  
8.520 -0.00732  
8.530 -0.00731  
8.540 -0.00729  
8.550 -0.00728  
8.560 -0.00726  
8.570 -0.00724  
8.580 -0.00721  
8.590 -0.00719  
8.600 -0.00716  
8.610 -0.00712  
8.620 -0.00709  
8.630 -0.00705  
8.640 -0.00701  
8.650 -0.00697  
8.660 -0.00692  
8.670 -0.00687  
8.680 -0.00682  
8.690 -0.00677  
8.700 -0.00672  
8.710 -0.00667  
8.720 -0.00661  
8.730 -0.00656  
8.740 -0.00650  
8.750 -0.00645  
8.760 -0.00639  
8.770 -0.00633  
8.780 -0.00628  
8.790 -0.00622  
8.800 -0.00617  
8.810 -0.00611  
8.820 -0.00606  
8.830 -0.00600  
8.840 -0.00595  
8.850 -0.00590  
8.860 -0.00584  
8.870 -0.00579  
8.880 -0.00573  
8.890 -0.00568  
8.900 -0.00562  
8.910 -0.00557  
8.920 -0.00551  
8.930 -0.00545  
8.940 -0.00539  
8.950 -0.00533  
8.960 -0.00526  
8.970 -0.00520  
8.980 -0.00513  
8.990 -0.00506  
9.000 -0.00499  
9.010 -0.00491  
9.020 -0.00484  
9.030 -0.00476  
9.040 -0.00468  
9.050 -0.00460

9.060 -0.00452  
9.070 -0.00443  
9.080 -0.00435  
9.090 -0.00426  
9.100 -0.00418  
9.110 -0.00410  
9.120 -0.00401  
9.130 -0.00393  
9.140 -0.00385  
9.150 -0.00377  
9.160 -0.00369  
9.170 -0.00361  
9.180 -0.00353  
9.190 -0.00346  
9.200 -0.00339  
9.210 -0.00332  
9.220 -0.00325  
9.230 -0.00319  
9.240 -0.00313  
9.250 -0.00307  
9.260 -0.00301  
9.270 -0.00295  
9.280 -0.00289  
9.290 -0.00283  
9.300 -0.00277  
9.310 -0.00271  
9.320 -0.00264  
9.330 -0.00258  
9.340 -0.00251  
9.350 -0.00244  
9.360 -0.00237  
9.370 -0.00229  
9.380 -0.00221  
9.390 -0.00213  
9.400 -0.00204  
9.410 -0.00195  
9.420 -0.00185  
9.430 -0.00175  
9.440 -0.00164  
9.450 -0.00153  
9.460 -0.00142  
9.470 -0.00131  
9.480 -0.00120  
9.490 -0.00109  
9.500 -0.00097  
9.510 -0.00086  
9.520 -0.00075  
9.530 -0.00064  
9.540 -0.00053  
9.550 -0.00043  
9.560 -0.00033  
9.570 -0.00023  
9.580 -0.00014  
9.590 -0.00006  
9.600 0.00002  
9.610 0.00010  
9.620 0.00017  
9.630 0.00023  
9.640 0.00028  
9.650 0.00033

9.660 0.00038  
9.670 0.00041  
9.680 0.00045  
9.690 0.00047  
9.700 0.00049  
9.710 0.00050  
9.720 0.00051  
9.730 0.00051  
9.740 0.00051  
9.750 0.00050  
9.760 0.00049  
9.770 0.00046  
9.780 0.00044  
9.790 0.00041  
9.800 0.00037  
9.810 0.00033  
9.820 0.00028  
9.830 0.00023  
9.840 0.00018  
9.850 0.00012  
9.860 0.00006  
9.870 -0.00000  
9.880 -0.00007  
9.890 -0.00013  
9.900 -0.00020  
9.910 -0.00026  
9.920 -0.00033  
9.930 -0.00039  
9.940 -0.00046  
9.950 -0.00052  
9.960 -0.00058  
9.970 -0.00063  
9.980 -0.00068  
9.990 -0.00073  
10.000 -0.00077  
10.010 -0.00081  
10.020 -0.00084  
10.030 -0.00087  
10.040 -0.00089  
10.050 -0.00091  
10.060 -0.00093  
10.070 -0.00095  
10.080 -0.00096  
10.090 -0.00097  
10.100 -0.00098  
10.110 -0.00099  
10.120 -0.00100  
10.130 -0.00101  
10.140 -0.00102  
10.150 -0.00103  
10.160 -0.00104  
10.170 -0.00106  
10.180 -0.00108  
10.190 -0.00110  
10.200 -0.00112  
10.210 -0.00115  
10.220 -0.00118  
10.230 -0.00121  
10.240 -0.00125  
10.250 -0.00128

10.260 -0.00132  
10.270 -0.00136  
10.280 -0.00140  
10.290 -0.00144  
10.300 -0.00147  
10.310 -0.00151  
10.320 -0.00154  
10.330 -0.00157  
10.340 -0.00160  
10.350 -0.00162  
10.360 -0.00164  
10.370 -0.00166  
10.380 -0.00167  
10.390 -0.00167  
10.400 -0.00166  
10.410 -0.00165  
10.420 -0.00164  
10.430 -0.00161  
10.440 -0.00158  
10.450 -0.00155  
10.460 -0.00151  
10.470 -0.00146  
10.480 -0.00142  
10.490 -0.00136  
10.500 -0.00131  
10.510 -0.00125  
10.520 -0.00120  
10.530 -0.00114  
10.540 -0.00107  
10.550 -0.00101  
10.560 -0.00095  
10.570 -0.00089  
10.580 -0.00083  
10.590 -0.00077  
10.600 -0.00071  
10.610 -0.00065  
10.620 -0.00060  
10.630 -0.00055  
10.640 -0.00050  
10.650 -0.00045  
10.660 -0.00041  
10.670 -0.00037  
10.680 -0.00033  
10.690 -0.00029  
10.700 -0.00025  
10.710 -0.00022  
10.720 -0.00019  
10.730 -0.00016  
10.740 -0.00013  
10.750 -0.00010  
10.760 -0.00008  
10.770 -0.00006  
10.780 -0.00004  
10.790 -0.00003  
10.800 -0.00001  
10.810 -0.00000  
10.820 0.00001  
10.830 0.00002  
10.840 0.00002  
10.850 0.00003

10.860 0.00003  
10.870 0.00003  
10.880 0.00003  
10.890 0.00003  
10.900 0.00003  
10.910 0.00003  
10.920 0.00003  
10.930 0.00002  
10.940 0.00002  
10.950 0.00002  
10.960 0.00001  
10.970 0.00001  
10.980 0.00001  
10.990 0.00000  
11.000 0.00000

nonbonded BB

0.010 8.68150  
0.020 8.66300  
0.030 8.64450  
0.040 8.62600  
0.050 8.60750  
0.060 8.58900  
0.070 8.57050  
0.080 8.55200  
0.090 8.53350  
0.100 8.51500  
0.110 8.49650  
0.120 8.47800  
0.130 8.45950  
0.140 8.44100  
0.150 8.42250  
0.160 8.40400  
0.170 8.38550  
0.180 8.36700  
0.190 8.34850  
0.200 8.33000  
0.210 8.31150  
0.220 8.29300  
0.230 8.27450  
0.240 8.25600  
0.250 8.23750  
0.260 8.21900  
0.270 8.20050  
0.280 8.18200  
0.290 8.16350  
0.300 8.14500  
0.310 8.12650  
0.320 8.10800  
0.330 8.08950  
0.340 8.07100  
0.350 8.05250  
0.360 8.03400  
0.370 8.01550  
0.380 7.99700  
0.390 7.97850  
0.400 7.96000  
0.410 7.94150  
0.420 7.92300



0.430 7.90450  
0.440 7.88600  
0.450 7.86750  
0.460 7.84900  
0.470 7.83050  
0.480 7.81200  
0.490 7.79350  
0.500 7.77500  
0.510 7.75650  
0.520 7.73800  
0.530 7.71950  
0.540 7.70100  
0.550 7.68250  
0.560 7.66400  
0.570 7.64550  
0.580 7.62700  
0.590 7.60850  
0.600 7.59000  
0.610 7.57150  
0.620 7.55300  
0.630 7.53450  
0.640 7.51600  
0.650 7.49750  
0.660 7.47900  
0.670 7.46050  
0.680 7.44200  
0.690 7.42350  
0.700 7.40500  
0.710 7.38650  
0.720 7.36800  
0.730 7.34950  
0.740 7.33100  
0.750 7.31250  
0.760 7.29400  
0.770 7.27550  
0.780 7.25700  
0.790 7.23850  
0.800 7.22000  
0.810 7.20150  
0.820 7.18300  
0.830 7.16450  
0.840 7.14600  
0.850 7.12750  
0.860 7.10900  
0.870 7.09050  
0.880 7.07200  
0.890 7.05350  
0.900 7.03500  
0.910 7.01650  
0.920 6.99800  
0.930 6.97950  
0.940 6.96100  
0.950 6.94250  
0.960 6.92400  
0.970 6.90550  
0.980 6.88700  
0.990 6.86850  
1.000 6.85000  
1.010 6.83150  
1.020 6.81300

1.030 6.79450  
1.040 6.77600  
1.050 6.75750  
1.060 6.73900  
1.070 6.72050  
1.080 6.70200  
1.090 6.68350  
1.100 6.66500  
1.110 6.64650  
1.120 6.62800  
1.130 6.60950  
1.140 6.59100  
1.150 6.57250  
1.160 6.55400  
1.170 6.53550  
1.180 6.51700  
1.190 6.49850  
1.200 6.48000  
1.210 6.46150  
1.220 6.44300  
1.230 6.42450  
1.240 6.40600  
1.250 6.38750  
1.260 6.36900  
1.270 6.35050  
1.280 6.33200  
1.290 6.31350  
1.300 6.29500  
1.310 6.27650  
1.320 6.25800  
1.330 6.23950  
1.340 6.22100  
1.350 6.20250  
1.360 6.18400  
1.370 6.16550  
1.380 6.14700  
1.390 6.12850  
1.400 6.11000  
1.410 6.09150  
1.420 6.07300  
1.430 6.05450  
1.440 6.03600  
1.450 6.01750  
1.460 5.99900  
1.470 5.98050  
1.480 5.96200  
1.490 5.94350  
1.500 5.92500  
1.510 5.90650  
1.520 5.88800  
1.530 5.86950  
1.540 5.85100  
1.550 5.83250  
1.560 5.81400  
1.570 5.79550  
1.580 5.77700  
1.590 5.75850  
1.600 5.74000  
1.610 5.72150  
1.620 5.70300

1.630 5.68450  
1.640 5.66600  
1.650 5.64750  
1.660 5.62900  
1.670 5.61050  
1.680 5.59200  
1.690 5.57350  
1.700 5.55500  
1.710 5.53650  
1.720 5.51800  
1.730 5.49950  
1.740 5.48100  
1.750 5.46250  
1.760 5.44400  
1.770 5.42550  
1.780 5.40700  
1.790 5.38850  
1.800 5.37000  
1.810 5.35150  
1.820 5.33300  
1.830 5.31450  
1.840 5.29600  
1.850 5.27750  
1.860 5.25900  
1.870 5.24050  
1.880 5.22200  
1.890 5.20350  
1.900 5.18500  
1.910 5.16650  
1.920 5.14800  
1.930 5.12950  
1.940 5.11100  
1.950 5.09250  
1.960 5.07400  
1.970 5.05550  
1.980 5.03700  
1.990 5.01850  
2.000 5.00000  
2.010 4.98150  
2.020 4.96300  
2.030 4.94450  
2.040 4.92600  
2.050 4.90750  
2.060 4.88900  
2.070 4.87050  
2.080 4.85200  
2.090 4.83350  
2.100 4.81500  
2.110 4.79650  
2.120 4.77800  
2.130 4.75950  
2.140 4.74100  
2.150 4.72250  
2.160 4.70400  
2.170 4.68550  
2.180 4.66700  
2.190 4.64850  
2.200 4.63000  
2.210 4.61150  
2.220 4.59300

2.230 4.57450  
2.240 4.55600  
2.250 4.53750  
2.260 4.51900  
2.270 4.50050  
2.280 4.48200  
2.290 4.46350  
2.300 4.44500  
2.310 4.42650  
2.320 4.40800  
2.330 4.38950  
2.340 4.37100  
2.350 4.35250  
2.360 4.33400  
2.370 4.31550  
2.380 4.29700  
2.390 4.27850  
2.400 4.26000  
2.410 4.24150  
2.420 4.22300  
2.430 4.20450  
2.440 4.18600  
2.450 4.16750  
2.460 4.14900  
2.470 4.13050  
2.480 4.11200  
2.490 4.09350  
2.500 4.07500  
2.510 4.05650  
2.520 4.03800  
2.530 4.01950  
2.540 4.00100  
2.550 3.98250  
2.560 3.96400  
2.570 3.94550  
2.580 3.92700  
2.590 3.90850  
2.600 3.89000  
2.610 3.87150  
2.620 3.85300  
2.630 3.83450  
2.640 3.81600  
2.650 3.79750  
2.660 3.77900  
2.670 3.76050  
2.680 3.74200  
2.690 3.72350  
2.700 3.70500  
2.710 3.68650  
2.720 3.66800  
2.730 3.64950  
2.740 3.63100  
2.750 3.61250  
2.760 3.59400  
2.770 3.57550  
2.780 3.55700  
2.790 3.53850  
2.800 3.52000  
2.810 3.50150  
2.820 3.48300

2.830 3.46450  
2.840 3.44600  
2.850 3.42750  
2.860 3.40900  
2.870 3.39050  
2.880 3.37200  
2.890 3.35350  
2.900 3.33500  
2.910 3.31650  
2.920 3.29800  
2.930 3.27950  
2.940 3.26100  
2.950 3.24250  
2.960 3.22400  
2.970 3.20550  
2.980 3.18700  
2.990 3.16850  
3.000 3.15000  
3.010 3.13150  
3.020 3.11300  
3.030 3.09450  
3.040 3.07600  
3.050 3.05750  
3.060 3.03900  
3.070 3.02050  
3.080 3.00200  
3.090 2.98350  
3.100 2.96500  
3.110 2.94650  
3.120 2.92800  
3.130 2.90950  
3.140 2.89100  
3.150 2.87250  
3.160 2.85400  
3.170 2.83550  
3.180 2.81700  
3.190 2.79850  
3.200 2.80981  
3.210 2.78419  
3.220 2.75374  
3.230 2.71857  
3.240 2.67884  
3.250 2.63468  
3.260 2.58624  
3.270 2.53365  
3.280 2.47706  
3.290 2.41660  
3.300 2.35241  
3.310 2.28464  
3.320 2.21342  
3.330 2.13889  
3.340 2.06120  
3.350 1.98048  
3.360 1.89687  
3.370 1.81052  
3.380 1.72156  
3.390 1.63013  
3.400 1.53638  
3.410 1.50411  
3.420 1.46985

3.430 1.43379  
3.440 1.39611  
3.450 1.35701  
3.460 1.31668  
3.470 1.27531  
3.480 1.23309  
3.490 1.19022  
3.500 1.14688  
3.510 1.10326  
3.520 1.05956  
3.530 1.01596  
3.540 0.97267  
3.550 0.92986  
3.560 0.88774  
3.570 0.84649  
3.580 0.80630  
3.590 0.76737  
3.600 0.72988  
3.610 0.69399  
3.620 0.65967  
3.630 0.62686  
3.640 0.59549  
3.650 0.56549  
3.660 0.53680  
3.670 0.50936  
3.680 0.48310  
3.690 0.45796  
3.700 0.43386  
3.710 0.41074  
3.720 0.38854  
3.730 0.36720  
3.740 0.34664  
3.750 0.32680  
3.760 0.30762  
3.770 0.28903  
3.780 0.27097  
3.790 0.25336  
3.800 0.23615  
3.810 0.21928  
3.820 0.20274  
3.830 0.18655  
3.840 0.17071  
3.850 0.15523  
3.860 0.14011  
3.870 0.12536  
3.880 0.11099  
3.890 0.09701  
3.900 0.08342  
3.910 0.07023  
3.920 0.05744  
3.930 0.04507  
3.940 0.03312  
3.950 0.02160  
3.960 0.01052  
3.970 -0.00012  
3.980 -0.01031  
3.990 -0.02005  
4.000 -0.02932  
4.010 -0.03812  
4.020 -0.04647

4.030 -0.05437  
4.040 -0.06184  
4.050 -0.06890  
4.060 -0.07556  
4.070 -0.08183  
4.080 -0.08773  
4.090 -0.09327  
4.100 -0.09846  
4.110 -0.10332  
4.120 -0.10787  
4.130 -0.11211  
4.140 -0.11606  
4.150 -0.11974  
4.160 -0.12315  
4.170 -0.12632  
4.180 -0.12926  
4.190 -0.13198  
4.200 -0.13449  
4.210 -0.13681  
4.220 -0.13894  
4.230 -0.14089  
4.240 -0.14267  
4.250 -0.14428  
4.260 -0.14572  
4.270 -0.14700  
4.280 -0.14813  
4.290 -0.14911  
4.300 -0.14994  
4.310 -0.15064  
4.320 -0.15120  
4.330 -0.15163  
4.340 -0.15195  
4.350 -0.15214  
4.360 -0.15222  
4.370 -0.15220  
4.380 -0.15207  
4.390 -0.15184  
4.400 -0.15153  
4.410 -0.15112  
4.420 -0.15064  
4.430 -0.15007  
4.440 -0.14943  
4.450 -0.14872  
4.460 -0.14794  
4.470 -0.14710  
4.480 -0.14619  
4.490 -0.14522  
4.500 -0.14420  
4.510 -0.14313  
4.520 -0.14202  
4.530 -0.14085  
4.540 -0.13965  
4.550 -0.13841  
4.560 -0.13714  
4.570 -0.13584  
4.580 -0.13451  
4.590 -0.13316  
4.600 -0.13179  
4.610 -0.13041  
4.620 -0.12901

4.630 -0.12760  
4.640 -0.12619  
4.650 -0.12477  
4.660 -0.12335  
4.670 -0.12193  
4.680 -0.12051  
4.690 -0.11910  
4.700 -0.11770  
4.710 -0.11631  
4.720 -0.11493  
4.730 -0.11358  
4.740 -0.11224  
4.750 -0.11092  
4.760 -0.10963  
4.770 -0.10837  
4.780 -0.10714  
4.790 -0.10594  
4.800 -0.10478  
4.810 -0.10366  
4.820 -0.10258  
4.830 -0.10153  
4.840 -0.10051  
4.850 -0.09953  
4.860 -0.09857  
4.870 -0.09765  
4.880 -0.09675  
4.890 -0.09587  
4.900 -0.09502  
4.910 -0.09419  
4.920 -0.09337  
4.930 -0.09258  
4.940 -0.09180  
4.950 -0.09103  
4.960 -0.09028  
4.970 -0.08954  
4.980 -0.08880  
4.990 -0.08807  
5.000 -0.08735  
5.010 -0.08662  
5.020 -0.08591  
5.030 -0.08519  
5.040 -0.08448  
5.050 -0.08377  
5.060 -0.08307  
5.070 -0.08238  
5.080 -0.08169  
5.090 -0.08100  
5.100 -0.08033  
5.110 -0.07965  
5.120 -0.07899  
5.130 -0.07834  
5.140 -0.07769  
5.150 -0.07705  
5.160 -0.07642  
5.170 -0.07580  
5.180 -0.07520  
5.190 -0.07460  
5.200 -0.07401  
5.210 -0.07343  
5.220 -0.07287



5.230 -0.07231  
5.240 -0.07177  
5.250 -0.07123  
5.260 -0.07070  
5.270 -0.07019  
5.280 -0.06968  
5.290 -0.06917  
5.300 -0.06868  
5.310 -0.06819  
5.320 -0.06771  
5.330 -0.06723  
5.340 -0.06676  
5.350 -0.06630  
5.360 -0.06584  
5.370 -0.06538  
5.380 -0.06493  
5.390 -0.06448  
5.400 -0.06403  
5.410 -0.06359  
5.420 -0.06315  
5.430 -0.06271  
5.440 -0.06227  
5.450 -0.06183  
5.460 -0.06140  
5.470 -0.06096  
5.480 -0.06052  
5.490 -0.06009  
5.500 -0.05965  
5.510 -0.05921  
5.520 -0.05877  
5.530 -0.05834  
5.540 -0.05789  
5.550 -0.05745  
5.560 -0.05701  
5.570 -0.05656  
5.580 -0.05611  
5.590 -0.05565  
5.600 -0.05520  
5.610 -0.05473  
5.620 -0.05427  
5.630 -0.05380  
5.640 -0.05333  
5.650 -0.05286  
5.660 -0.05238  
5.670 -0.05190  
5.680 -0.05142  
5.690 -0.05094  
5.700 -0.05046  
5.710 -0.04997  
5.720 -0.04949  
5.730 -0.04900  
5.740 -0.04851  
5.750 -0.04803  
5.760 -0.04754  
5.770 -0.04706  
5.780 -0.04657  
5.790 -0.04609  
5.800 -0.04560  
5.810 -0.04512  
5.820 -0.04464

5.830 -0.04417  
5.840 -0.04369  
5.850 -0.04322  
5.860 -0.04275  
5.870 -0.04228  
5.880 -0.04182  
5.890 -0.04136  
5.900 -0.04090  
5.910 -0.04044  
5.920 -0.03999  
5.930 -0.03955  
5.940 -0.03911  
5.950 -0.03867  
5.960 -0.03824  
5.970 -0.03781  
5.980 -0.03739  
5.990 -0.03697  
6.000 -0.03656  
6.010 -0.03616  
6.020 -0.03576  
6.030 -0.03537  
6.040 -0.03498  
6.050 -0.03461  
6.060 -0.03424  
6.070 -0.03388  
6.080 -0.03352  
6.090 -0.03318  
6.100 -0.03284  
6.110 -0.03251  
6.120 -0.03220  
6.130 -0.03189  
6.140 -0.03159  
6.150 -0.03131  
6.160 -0.03103  
6.170 -0.03077  
6.180 -0.03052  
6.190 -0.03028  
6.200 -0.03005  
6.210 -0.02984  
6.220 -0.02964  
6.230 -0.02945  
6.240 -0.02926  
6.250 -0.02909  
6.260 -0.02893  
6.270 -0.02878  
6.280 -0.02863  
6.290 -0.02849  
6.300 -0.02835  
6.310 -0.02822  
6.320 -0.02809  
6.330 -0.02797  
6.340 -0.02785  
6.350 -0.02773  
6.360 -0.02761  
6.370 -0.02749  
6.380 -0.02737  
6.390 -0.02725  
6.400 -0.02713  
6.410 -0.02700  
6.420 -0.02687

6.430 -0.02674  
6.440 -0.02660  
6.450 -0.02646  
6.460 -0.02631  
6.470 -0.02616  
6.480 -0.02601  
6.490 -0.02584  
6.500 -0.02568  
6.510 -0.02550  
6.520 -0.02532  
6.530 -0.02513  
6.540 -0.02494  
6.550 -0.02474  
6.560 -0.02453  
6.570 -0.02431  
6.580 -0.02408  
6.590 -0.02385  
6.600 -0.02360  
6.610 -0.02335  
6.620 -0.02309  
6.630 -0.02282  
6.640 -0.02255  
6.650 -0.02227  
6.660 -0.02198  
6.670 -0.02168  
6.680 -0.02139  
6.690 -0.02109  
6.700 -0.02078  
6.710 -0.02048  
6.720 -0.02017  
6.730 -0.01986  
6.740 -0.01955  
6.750 -0.01924  
6.760 -0.01893  
6.770 -0.01863  
6.780 -0.01832  
6.790 -0.01802  
6.800 -0.01773  
6.810 -0.01743  
6.820 -0.01715  
6.830 -0.01686  
6.840 -0.01659  
6.850 -0.01632  
6.860 -0.01605  
6.870 -0.01580  
6.880 -0.01555  
6.890 -0.01530  
6.900 -0.01507  
6.910 -0.01484  
6.920 -0.01463  
6.930 -0.01442  
6.940 -0.01422  
6.950 -0.01403  
6.960 -0.01386  
6.970 -0.01369  
6.980 -0.01353  
6.990 -0.01339  
7.000 -0.01326  
7.010 -0.01314  
7.020 -0.01303

7.030 -0.01294  
7.040 -0.01285  
7.050 -0.01277  
7.060 -0.01270  
7.070 -0.01264  
7.080 -0.01258  
7.090 -0.01253  
7.100 -0.01248  
7.110 -0.01243  
7.120 -0.01239  
7.130 -0.01235  
7.140 -0.01231  
7.150 -0.01227  
7.160 -0.01222  
7.170 -0.01218  
7.180 -0.01213  
7.190 -0.01208  
7.200 -0.01202  
7.210 -0.01196  
7.220 -0.01189  
7.230 -0.01181  
7.240 -0.01173  
7.250 -0.01164  
7.260 -0.01155  
7.270 -0.01145  
7.280 -0.01135  
7.290 -0.01124  
7.300 -0.01112  
7.310 -0.01101  
7.320 -0.01088  
7.330 -0.01075  
7.340 -0.01062  
7.350 -0.01048  
7.360 -0.01034  
7.370 -0.01019  
7.380 -0.01004  
7.390 -0.00988  
7.400 -0.00972  
7.410 -0.00956  
7.420 -0.00939  
7.430 -0.00922  
7.440 -0.00905  
7.450 -0.00888  
7.460 -0.00871  
7.470 -0.00853  
7.480 -0.00836  
7.490 -0.00819  
7.500 -0.00802  
7.510 -0.00785  
7.520 -0.00768  
7.530 -0.00752  
7.540 -0.00737  
7.550 -0.00721  
7.560 -0.00707  
7.570 -0.00693  
7.580 -0.00680  
7.590 -0.00667  
7.600 -0.00656  
7.610 -0.00645  
7.620 -0.00635

7.630 -0.00626  
7.640 -0.00618  
7.650 -0.00611  
7.660 -0.00604  
7.670 -0.00598  
7.680 -0.00592  
7.690 -0.00587  
7.700 -0.00583  
7.710 -0.00579  
7.720 -0.00575  
7.730 -0.00572  
7.740 -0.00569  
7.750 -0.00567  
7.760 -0.00565  
7.770 -0.00563  
7.780 -0.00561  
7.790 -0.00559  
7.800 -0.00558  
7.810 -0.00556  
7.820 -0.00555  
7.830 -0.00554  
7.840 -0.00552  
7.850 -0.00551  
7.860 -0.00550  
7.870 -0.00549  
7.880 -0.00549  
7.890 -0.00548  
7.900 -0.00548  
7.910 -0.00547  
7.920 -0.00547  
7.930 -0.00547  
7.940 -0.00548  
7.950 -0.00548  
7.960 -0.00549  
7.970 -0.00550  
7.980 -0.00551  
7.990 -0.00552  
8.000 -0.00554  
8.010 -0.00556  
8.020 -0.00558  
8.030 -0.00561  
8.040 -0.00563  
8.050 -0.00566  
8.060 -0.00569  
8.070 -0.00571  
8.080 -0.00574  
8.090 -0.00577  
8.100 -0.00579  
8.110 -0.00582  
8.120 -0.00584  
8.130 -0.00586  
8.140 -0.00588  
8.150 -0.00589  
8.160 -0.00590  
8.170 -0.00591  
8.180 -0.00591  
8.190 -0.00591  
8.200 -0.00590  
8.210 -0.00589  
8.220 -0.00587

8.230 -0.00585  
8.240 -0.00582  
8.250 -0.00578  
8.260 -0.00574  
8.270 -0.00570  
8.280 -0.00565  
8.290 -0.00560  
8.300 -0.00554  
8.310 -0.00548  
8.320 -0.00541  
8.330 -0.00534  
8.340 -0.00527  
8.350 -0.00519  
8.360 -0.00511  
8.370 -0.00503  
8.380 -0.00494  
8.390 -0.00485  
8.400 -0.00476  
8.410 -0.00466  
8.420 -0.00457  
8.430 -0.00447  
8.440 -0.00437  
8.450 -0.00427  
8.460 -0.00417  
8.470 -0.00407  
8.480 -0.00398  
8.490 -0.00388  
8.500 -0.00379  
8.510 -0.00370  
8.520 -0.00362  
8.530 -0.00354  
8.540 -0.00347  
8.550 -0.00340  
8.560 -0.00334  
8.570 -0.00329  
8.580 -0.00325  
8.590 -0.00321  
8.600 -0.00319  
8.610 -0.00317  
8.620 -0.00316  
8.630 -0.00316  
8.640 -0.00317  
8.650 -0.00319  
8.660 -0.00322  
8.670 -0.00325  
8.680 -0.00329  
8.690 -0.00334  
8.700 -0.00339  
8.710 -0.00345  
8.720 -0.00352  
8.730 -0.00358  
8.740 -0.00366  
8.750 -0.00373  
8.760 -0.00381  
8.770 -0.00389  
8.780 -0.00398  
8.790 -0.00406  
8.800 -0.00415  
8.810 -0.00424  
8.820 -0.00433

8.830 -0.00442  
8.840 -0.00451  
8.850 -0.00460  
8.860 -0.00469  
8.870 -0.00477  
8.880 -0.00485  
8.890 -0.00493  
8.900 -0.00501  
8.910 -0.00508  
8.920 -0.00515  
8.930 -0.00521  
8.940 -0.00527  
8.950 -0.00532  
8.960 -0.00536  
8.970 -0.00540  
8.980 -0.00543  
8.990 -0.00545  
9.000 -0.00546  
9.010 -0.00546  
9.020 -0.00546  
9.030 -0.00544  
9.040 -0.00542  
9.050 -0.00539  
9.060 -0.00536  
9.070 -0.00532  
9.080 -0.00528  
9.090 -0.00524  
9.100 -0.00519  
9.110 -0.00514  
9.120 -0.00508  
9.130 -0.00503  
9.140 -0.00498  
9.150 -0.00493  
9.160 -0.00488  
9.170 -0.00483  
9.180 -0.00478  
9.190 -0.00474  
9.200 -0.00470  
9.210 -0.00467  
9.220 -0.00464  
9.230 -0.00462  
9.240 -0.00460  
9.250 -0.00459  
9.260 -0.00458  
9.270 -0.00457  
9.280 -0.00457  
9.290 -0.00457  
9.300 -0.00457  
9.310 -0.00458  
9.320 -0.00459  
9.330 -0.00460  
9.340 -0.00462  
9.350 -0.00464  
9.360 -0.00466  
9.370 -0.00468  
9.380 -0.00470  
9.390 -0.00473  
9.400 -0.00475  
9.410 -0.00478  
9.420 -0.00481

9.430 -0.00484  
9.440 -0.00487  
9.450 -0.00490  
9.460 -0.00493  
9.470 -0.00496  
9.480 -0.00499  
9.490 -0.00503  
9.500 -0.00506  
9.510 -0.00509  
9.520 -0.00512  
9.530 -0.00515  
9.540 -0.00518  
9.550 -0.00522  
9.560 -0.00524  
9.570 -0.00527  
9.580 -0.00530  
9.590 -0.00533  
9.600 -0.00535  
9.610 -0.00538  
9.620 -0.00540  
9.630 -0.00542  
9.640 -0.00544  
9.650 -0.00546  
9.660 -0.00548  
9.670 -0.00550  
9.680 -0.00552  
9.690 -0.00554  
9.700 -0.00556  
9.710 -0.00558  
9.720 -0.00560  
9.730 -0.00563  
9.740 -0.00565  
9.750 -0.00567  
9.760 -0.00570  
9.770 -0.00573  
9.780 -0.00576  
9.790 -0.00579  
9.800 -0.00583  
9.810 -0.00586  
9.820 -0.00590  
9.830 -0.00595  
9.840 -0.00599  
9.850 -0.00603  
9.860 -0.00608  
9.870 -0.00612  
9.880 -0.00616  
9.890 -0.00621  
9.900 -0.00625  
9.910 -0.00629  
9.920 -0.00633  
9.930 -0.00636  
9.940 -0.00639  
9.950 -0.00642  
9.960 -0.00645  
9.970 -0.00647  
9.980 -0.00648  
9.990 -0.00649  
10.000 -0.00650  
10.010 -0.00650  
10.020 -0.00649



10.030 -0.00648  
10.040 -0.00647  
10.050 -0.00645  
10.060 -0.00643  
10.070 -0.00640  
10.080 -0.00638  
10.090 -0.00635  
10.100 -0.00632  
10.110 -0.00629  
10.120 -0.00626  
10.130 -0.00623  
10.140 -0.00620  
10.150 -0.00618  
10.160 -0.00615  
10.170 -0.00613  
10.180 -0.00611  
10.190 -0.00610  
10.200 -0.00609  
10.210 -0.00609  
10.220 -0.00609  
10.230 -0.00609  
10.240 -0.00610  
10.250 -0.00611  
10.260 -0.00612  
10.270 -0.00614  
10.280 -0.00616  
10.290 -0.00617  
10.300 -0.00619  
10.310 -0.00621  
10.320 -0.00623  
10.330 -0.00624  
10.340 -0.00626  
10.350 -0.00627  
10.360 -0.00628  
10.370 -0.00629  
10.380 -0.00629  
10.390 -0.00629  
10.400 -0.00628  
10.410 -0.00627  
10.420 -0.00625  
10.430 -0.00623  
10.440 -0.00620  
10.450 -0.00617  
10.460 -0.00613  
10.470 -0.00608  
10.480 -0.00603  
10.490 -0.00597  
10.500 -0.00590  
10.510 -0.00583  
10.520 -0.00575  
10.530 -0.00566  
10.540 -0.00557  
10.550 -0.00547  
10.560 -0.00536  
10.570 -0.00524  
10.580 -0.00512  
10.590 -0.00499  
10.600 -0.00485  
10.610 -0.00470  
10.620 -0.00455

|        |          |
|--------|----------|
| 10.630 | -0.00439 |
| 10.640 | -0.00422 |
| 10.650 | -0.00405 |
| 10.660 | -0.00388 |
| 10.670 | -0.00370 |
| 10.680 | -0.00352 |
| 10.690 | -0.00334 |
| 10.700 | -0.00316 |
| 10.710 | -0.00298 |
| 10.720 | -0.00280 |
| 10.730 | -0.00263 |
| 10.740 | -0.00245 |
| 10.750 | -0.00229 |
| 10.760 | -0.00212 |
| 10.770 | -0.00197 |
| 10.780 | -0.00182 |
| 10.790 | -0.00167 |
| 10.800 | -0.00154 |
| 10.810 | -0.00142 |
| 10.820 | -0.00130 |
| 10.830 | -0.00119 |
| 10.840 | -0.00110 |
| 10.850 | -0.00100 |
| 10.860 | -0.00092 |
| 10.870 | -0.00084 |
| 10.880 | -0.00076 |
| 10.890 | -0.00069 |
| 10.900 | -0.00062 |
| 10.910 | -0.00056 |
| 10.920 | -0.00049 |
| 10.930 | -0.00043 |
| 10.940 | -0.00037 |
| 10.950 | -0.00031 |
| 10.960 | -0.00025 |
| 10.970 | -0.00019 |
| 10.980 | -0.00013 |
| 10.990 | -0.00007 |
| 11.000 | 0.00000  |
